# Supplementary material for: Molecular evidence for an active endogenous microbiome beneath glacial ice
Source: PubMed Central journal article supplement — ISME J. 2013 Mar 14;7(7):1402–12. doi: 10.1038/ismej.2013.31 (PMC3695297; doi:10.1038/ismej.2013.31), 2013-03-14
Supplement: ismej201331x1.pdf [file ismej201331x1.pdf]

## SUPPLEMENTARY INFORMATION

### METHODS

**Sample Collection.** Subglacial sediments were collected aseptically from the eastern drainage of Robertson Glacier (RE) using spatulas and spoons that were flame sterilized immediately before sample collection. Fine-grained sediments were collected from a point ~ 1 meter from the back of an ice cave at RE. RE was selected over the western drainage of Robertson Glacier (RW) for sampling due to the unstable nature of the ice cave present at RW. Subglacial sediments were collected from the top 0.5 cm of the sediment deposition zone and subsamples were immediately placed in pre-sterilized microcentrifuge tubes (DNA-based analyses) or microcentrifuge tubes containing 500  $\mu$ L RNALater (RNA-based analyses), as described in the main body of the text. Triplicate subsamples of subglacial sediments for use in DNA and RNA-based analyses were collected randomly from 6 sites in the ice cave sediment deposition zone over an area ~ 0.5 m<sup>2</sup>, and then a random draw of 3 aliquots of sediment from 3 of these locations were used in nucleic acid extractions. Cryoconite debris was collected from a prominent (~ 10 cm diameter) cryoconite melt hole ~ 600 m up the glacier from RE. While numerous cryoconite melt holes exist on the surface of RG, this particular melt hole was selected on the basis of its larger size relative to other adjacent melt holes and the hypothesis that surface discharge from this collection of melt holes would potentially drain into the subglacial environment via the largest moulin on the surface of the glacier. Triplicate ~ 1 g subsamples of sediment were collected randomly from the top 0.5 cm of the sediment layer for use in DNA- and RNA-based analyses, as described above. The site for collecting snow from the surface of RG was also chosen on the basis of its close proximity to the very large moulin on the surface of

RG and the hypothesis that debris from the melt water would feed into the subglacial environment through this feature. The surface layer (down to ~1 cm depth) of the snow was loosely packed into 3 sterile 500-mL sterile polypropylene bottles using a flame-sterilized spoon. The triplicate subsamples of snow were sampled over an area of ~ 4 m<sup>2</sup>. All subglacial sediment, cryoconite, and snow samples were frozen immediately using dry ice. Samples were transported from the field site to Montana State University on dry ice and, once at the lab, were placed at -80°C until further processed. At the lab snow samples were thawed at 4°C, homogenized by shaking, and dispensed into clean and autoclave-sterilized 500-mL centrifuge bottles. The debris in the melted snow was concentrated via centrifugation (14,000 x g, 5 min., 4°C). Following centrifugation, melt water was decanted and the debris pellet from each triplicate sample was transferred into triplicate bead beating tubes using a sterilized spatula and subjected to nucleic acid extraction immediately. The dry weight solids content of the snow debris, subglacial sediments and cryoconite sediments was determined by drying the material left after bead beating extraction at 80°C for 24 hrs.

The temperature and pH of the fluids overlaying the subglacial sediments and cryoconite debris were determined using a temperature compensated model 59002-00 Cole-Parmer electrode. An alcohol thermometer was used to confirm temperature. The temperature of snow was measured by inserting the alcohol thermometer laterally in the top 0.5 cm of the snow. The pH of the snow was determined using the decanted melt water. The conductivity of the fluids overlaying the subglacial sediments and cryoconite debris was determined using a YSI model 33 S-C-T meter (Yellow Springs Instrument Company, Inc., Yellow Springs, Ohio). Conductivity

values were standardized to a common temperature of 25.0°C as previously described (Hamilton et al, 2011). Additional details of the chemistry of the fluids overlaying subglacial sediments as well as subglacial sediment porewater chemistry has been previously reported (Boyd et al, 2010, Boyd et al, 2011).

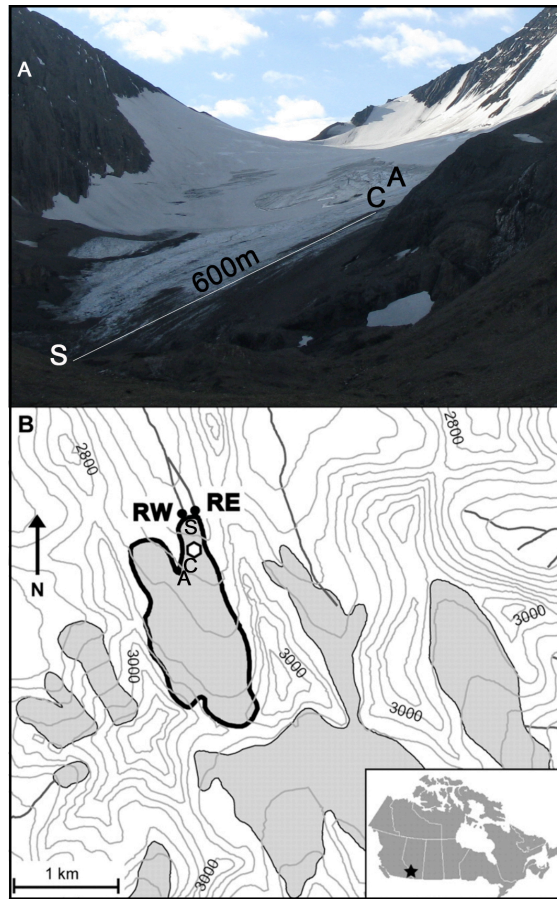

**Supp. Fig. 1.** Photograph from the terminus of Robertson Glacier looking up the glacier. Sampling sites are denoted as S: Subglacial sediments; C: Cryoconite melthole; A: snow (Panel A). Topographic map of Robertson Glacier showing the RE and RW subglacial stream drainages and the location of the sampling sites, S: Subglacial sediments; C: Cryoconite melthole; A: snow. The location of RG (star) in Alberta, Canada is shown in the inset (Panel B). Map adapted from Boyd et al, 2011.

**Supplemental Table 1.** Physical and chemical data for the subglacial meltwater at the site of subglacial sediment collection. Measurements were also performed on the water overlaying the cryoconite melt hole and on melted snow.

| Sample            | pH  | Temp. (°C) | Cond. (µmhos/cm) |
|-------------------|-----|------------|------------------|
| Subglacial        | 8.8 | 0.3        | 110              |
| Cryoconite        | 8.2 | 0.1        | 18               |
| Snow <sup>a</sup> | 7.0 | 0.1        | -                |

<sup>a</sup>pH measured after melting, conductivity not measured.

Supplemental Table 2. Frequency, accession numbers and affiliations of archaeal 16S rRNA and rDNA sequences.

| Number of OTUs |                 |                |                 |          |           | Taxonomy <sup>a</sup> |                  | Rep Seq <sup>b</sup> | Accession Number |
|----------------|-----------------|----------------|-----------------|----------|-----------|-----------------------|------------------|----------------------|------------------|
| Subglacial DNA | Subglacial cDNA | Cryoconite DNA | Cryoconite cDNA | Snow DNA | Snow cDNA | Phylum                | Genus            |                      |                  |
| 1              | 2               | 1              | 0               | 0        | 0         | Euryarchaeota         | Ferroplasma      | RG-Arch1             | SAMN01729343     |
| 5              | 34              | 9              | 65              | 0        | 0         | Euryarchaeota         | Methanosarcina   | RG-Arch2             | SAMN01729344     |
| 117            | 93              | 124            | 71              | 0        | 0         | Euryarchaeota         | Methanosphaerula | RG-Arch3             | SAMN01729345     |
| 0              | 1               | 0              | 0               | 1        | 2         | Thaumarchaeota        | Nitrososphaera   | RG-Arch4             | SAMN01729346     |
| 2              | 1               | 2              | 0               | 132      | 128       | Thaumarchaeota        | Nitrososphaera   | RG-Arch5             | SAMN01729347     |
| 0              | 0               | 0              | 0               | 2        | 3         | Crenarchaeota         | Thermosphaera    | RG-Arch6             | SAMN01729348     |
| 0              | 0               | 0              | 0               | 1        | 3         | Crenarchaeota         | Desulfurococcus  | RG-Arch7             | SAMN01729349     |
| 0              | 5               | 0              | 0               | 0        | 0         | Euryarchaeota         | Methanosaeta     | RG-Arch8             | SAMN01729350     |
| 1              | 0               | 0              | 0               | 0        | 0         | Euryarchaeota         | Methanoregula    | RG-Arch9             | SAMN01729351     |
| 8              | 0               | 0              | 0               | 0        | 0         | Crenarchaeota         | Pyrobaculum      | RG-Arch10            | SAMN01729352     |
| 1              | 0               | 0              | 0               | 0        | 0         | Crenarchaeota         | Thermoproteus    | RG-Arch11            | SAMN01729353     |
| 1              | 0               | 0              | 0               | 0        | 0         | Euryarchaeota         | Methanoregula    | RG-Arch12            | SAMN01729354     |

<sup>a</sup>Closest cultured representative as determined by BLASTn

<sup>b</sup>Representative sequence

Supplemental Table 3. Frequency, accession numbers and affiliations of archaeal 16S rRNA and rDNA sequences.

| Number of OTUs |                 |                |                 |          |           | Taxonomy <sup>a</sup> |                     | Rep Seq <sup>b</sup> | Accession Number |
|----------------|-----------------|----------------|-----------------|----------|-----------|-----------------------|---------------------|----------------------|------------------|
| Subglacial DNA | Subglacial cDNA | Cryoconite DNA | Cryoconite cDNA | Snow DNA | Snow cDNA | Phylum                | Genus               |                      |                  |
| 85             | 294             | 171            | 199             | 0        | 0         | Proteobacteria        | Sideroxydans        | RG-Bac1              |                  |
| 109            | 186             | 57             | 53              | 0        | 0         | Proteobacteria        | Denitratisona       | RG-Bac2              | SAMN01729355     |
| 14             | 105             | 0              | 5               | 22       | 0         | Proteobacteria        | Salmonella          | RG-Bac3              | SAMN01729356     |
| 99             | 125             | 93             | 70              | 506      | 109       | Bacteroidetes         | Ferruginibacter     | RG-Bac4              | SAMN01729357     |
| 3              | 2               | 10             | 4               | 15       | 0         | Bacteroidetes         | Ferruginibacter     | RG-Bac5              | SAMN01729358     |
| 116            | 83              | 74             | 113             | 9        | 87        | Proteobacteria        | Curvibacter         | RG-Bac6              | SAMN01729359     |
| 0              | 41              | 0              | 3               | 0        | 0         | Bacteroidetes         | Wandonia            | RG-Bac7              | SAMN01729360     |
| 186            | 111             | 394            | 449             | 476      | 553       | Proteobacteria        | Polaromonas         | RG-Bac8              | SAMN01729361     |
| 0              | 8               | 1              | 11              | 72       | 14        | Bacteroidetes         | Arcicella           | RG-Bac9              | SAMN01729362     |
| 5              | 46              | 3              | 6               | 0        | 0         | Firmicutes            | Weissella           | RG-Bac10             | SAMN01729363     |
| 123            | 69              | 153            | 41              | 10       | 251       | Firmicutes            | Paenisporosarcina   | RG-Bac11             | SAMN01729364     |
| 1              | 30              | 14             | 13              | 3        | 5         | Bacteroidetes         | Cryomorpha          | RG-Bac12             | SAMN01729365     |
| 1              | 27              | 11             | 1               | 0        | 0         | Bacteroidetes         | Flavobacterium      | RG-Bac13             | SAMN01729366     |
| 1              | 5               | 1              | 1               | 0        | 0         | Bacteroidetes         | Segetibacter        | RG-Bac14             | SAMN01729367     |
| 72             | 72              | 20             | 31              | 0        | 2         | Proteobacteria        | Pelobacter          | RG-Bac15             | SAMN01729368     |
| 0              | 14              | 3              | 0               | 0        | 0         | Bacteroidetes         | Pedobacter          | RG-Bac16             | SAMN01729369     |
| 1              | 5               | 1              | 23              | 0        | 0         | Firmicutes            | Gracilibacter       | RG-Bac17             | SAMN01729370     |
| 0              | 1               | 0              | 0               | 0        | 0         | Bacteroidetes         | Pedobacter          | RG-Bac18             | SAMN01729371     |
| 0              | 1               | 2              | 2               | 0        | 0         | Bacteroidetes         | Sporocytophaga      | RG-Bac19             | SAMN01729372     |
| 50             | 2               | 57             | 25              | 0        | 0         | Proteobacteria        | Rhodobacter         | RG-Bac20             | SAMN01729373     |
| 37             | 1               | 6              | 24              | 0        | 0         | Proteobacteria        | Rhodofera           | RG-Bac21             | SAMN01729374     |
| 0              | 1               | 0              | 0               | 0        | 0         | Deinococcus-Thermus   | Truepera            | RG-Bac22             | SAMN01729375     |
| 8              | 3               | 0              | 0               | 0        | 0         | Firmicutes            | Clostridium         | RG-Bac23             | SAMN01729376     |
| 2              | 2               | 2              | 0               | 0        | 34        | Firmicutes            | Anaerovibrio        | RG-Bac24             | SAMN01729377     |
| 0              | 3               | 0              | 0               | 0        | 0         | Proteobacteria        | Ralstonia           | RG-Bac25             | SAMN01729378     |
| 13             | 3               | 2              | 1               | 0        | 0         | Proteobacteria        | Lysobacter          | RG-Bac26             | SAMN01729379     |
| 17             | 1               | 3              | 5               | 3        | 0         | Bacteroidetes         | Hymenobacter        | RG-Bac27             | SAMN01729380     |
| 8              | 1               | 3              | 1               | 0        | 0         | Deinococcus-Thermus   | Deinococcus         | RG-Bac28             | SAMN01729381     |
| 7              | 3               | 1              | 0               | 2        | 0         | Proteobacteria        | Sphingomonas        | RG-Bac29             | SAMN01729382     |
| 1              | 5               | 0              | 0               | 0        | 0         | Proteobacteria        | Escherichia         | RG-Bac30             | SAMN01729383     |
| 0              | 1               | 0              | 2               | 0        | 0         | Firmicutes            | Desulfosporosinus   | RG-Bac31             | SAMN01729384     |
| 0              | 2               | 3              | 0               | 0        | 0         | Verrucomicrobia       | Verrucomicrobium    | RG-Bac32             | SAMN01729385     |
| 7              | 0               | 98             | 123             | 68       | 190       | Proteobacteria        | Piscinibacter       | RG-Bac33             | SAMN01729386     |
| 4              | 3               | 3              | 0               | 0        | 5         | Proteobacteria        | Sphingomonas        | RG-Bac34             | SAMN01729387     |
| 0              | 1               | 0              | 0               | 0        | 0         | Firmicutes            | Bacillus            | RG-Bac35             | SAMN01729388     |
| 0              | 2               | 0              | 0               | 0        | 0         | Bacteroidetes         | Cytophaga           | RG-Bac36             | SAMN01729389     |
| 0              | 1               | 0              | 1               | 0        | 0         | Firmicutes            | Clostridium         | RG-Bac37             | SAMN01729390     |
| 0              | 1               | 0              | 0               | 0        | 0         | Nitrospira            | Thermodesulfobivrio | RG-Bac38             | SAMN01729391     |

|    |   |   |   |    |    |                 |                   |          |              |
|----|---|---|---|----|----|-----------------|-------------------|----------|--------------|
| 0  | 2 | 0 | 0 | 0  | 0  | Firmicutes      | Clostridium       | RG-Bac39 | SAMN01729392 |
| 6  | 0 | 0 | 0 | 0  | 0  | Proteobacteria  | Peredibacter      | RG-Bac40 | SAMN01729393 |
| 0  | 1 | 0 | 0 | 0  | 0  | Proteobacteria  | Bdellovibrio      | RG-Bac41 | SAMN01729394 |
| 11 | 1 | 4 | 3 | 4  | 0  | Proteobacteria  | Methylomonas      | RG-Bac42 | SAMN01729395 |
| 3  | 1 | 5 | 1 | 15 | 1  | Bacteroidetes   | Hymenobacter      | RG-Bac43 | SAMN01729396 |
| 1  | 0 | 2 | 1 | 0  | 0  | Chloroflexi     | Herpetosiphon     | RG-Bac44 | SAMN01729397 |
| 0  | 1 | 0 | 0 | 0  | 0  | Bacteroidetes   | Emticia           | RG-Bac45 | SAMN01729398 |
| 0  | 1 | 0 | 0 | 0  | 0  | Firmicutes      | Streptococcus     | RG-Bac46 | SAMN01729399 |
| 0  | 2 | 1 | 0 | 0  | 0  | Proteobacteria  | Cystobacter       | RG-Bac47 | SAMN01729400 |
| 8  | 2 | 0 | 0 | 0  | 0  | Firmicutes      | Staphylococcus    | RG-Bac48 | SAMN01729401 |
| 0  | 1 | 1 | 0 | 0  | 0  | Bacteroidetes   | Chryseobacterium  | RG-Bac49 | SAMN01729402 |
| 2  | 1 | 1 | 0 | 0  | 0  | Proteobacteria  | Sphingopyxis      | RG-Bac50 | SAMN01729403 |
| 5  | 1 | 3 | 7 | 41 | 8  | Proteobacteria  | Massilia          | RG-Bac51 | SAMN01729404 |
| 0  | 0 | 2 | 1 | 0  | 0  | Proteobacteria  | Sulfitobacter     | RG-Bac52 | SAMN01729405 |
| 0  | 1 | 0 | 0 | 0  | 0  | Bacteroidetes   | Flavisolibacter   | RG-Bac53 | SAMN01729406 |
| 0  | 1 | 1 | 2 | 0  | 0  | Proteobacteria  | Geobacter         | RG-Bac54 | SAMN01729407 |
| 0  | 0 | 1 | 2 | 0  | 0  | Bacteroidetes   | Paludibacter      | RG-Bac55 | SAMN01729408 |
| 0  | 1 | 0 | 0 | 0  | 0  | Chloroflexi     | Chloroflexus      | RG-Bac56 | SAMN01729409 |
| 0  | 0 | 1 | 0 | 1  | 0  | Proteobacteria  | Devosia           | RG-Bac57 | SAMN01729410 |
| 7  | 0 | 1 | 5 | 0  | 12 | Proteobacteria  | Aquabacterium     | RG-Bac58 | SAMN01729411 |
| 14 | 0 | 3 | 3 | 9  | 1  | Proteobacteria  | Leptothrix        | RG-Bac59 | SAMN01729412 |
| 0  | 0 | 1 | 9 | 0  | 0  | Proteobacteria  | Phaselicystis     | RG-Bac60 | SAMN01729413 |
| 2  | 0 | 1 | 6 | 0  | 0  | Actinobacteria  | Ilumatobacter     | RG-Bac61 | SAMN01729414 |
| 10 | 0 | 4 | 6 | 1  | 0  | Proteobacteria  | Arenimonas        | RG-Bac62 | SAMN01729415 |
| 0  | 0 | 0 | 2 | 0  | 0  | Proteobacteria  | Janthinobacterium | RG-Bac63 | SAMN01729416 |
| 2  | 0 | 3 | 6 | 0  | 0  | Proteobacteria  | Byssovorax        | RG-Bac64 | SAMN01729417 |
| 0  | 0 | 0 | 4 | 0  | 0  | Verrucomicrobia | Haloferula        | RG-Bac65 | SAMN01729418 |
| 0  | 0 | 1 | 2 | 4  | 0  | Actinobacteria  | Agreia            | RG-Bac66 | SAMN01729419 |
| 0  | 0 | 0 | 2 | 0  | 0  | Actinobacteria  | Solirubrobacter   | RG-Bac67 | SAMN01729420 |
| 0  | 0 | 0 | 1 | 0  | 0  | Bacteroidetes   | Marinifilum       | RG-Bac68 | SAMN01729421 |
| 22 | 0 | 7 | 2 | 0  | 0  | Proteobacteria  | Methylibium       | RG-Bac69 | SAMN01729422 |
| 0  | 0 | 0 | 0 | 6  | 0  | Proteobacteria  | Variovorax        | RG-Bac70 | SAMN01729423 |
| 0  | 0 | 0 | 2 | 0  | 0  | Actinobacteria  | Eggerthella       | RG-Bac71 | SAMN01729424 |
| 0  | 0 | 1 | 1 | 0  | 0  | Proteobacteria  | Polyangium        | RG-Bac72 | SAMN01729425 |
| 0  | 0 | 1 | 0 | 0  | 0  | Proteobacteria  | Cellvibrio        | RG-Bac73 | SAMN01729426 |
| 16 | 0 | 0 | 0 | 0  | 0  | Verrucomicrobia | Opitutus          | RG-Bac74 | SAMN01729427 |
| 2  | 0 | 0 | 2 | 0  | 0  | Proteobacteria  | Nannocystis       | RG-Bac75 | SAMN01729428 |
| 0  | 0 | 3 | 0 | 0  | 0  | Actinobacteria  | Iamia             | RG-Bac76 | SAMN01729429 |
| 0  | 0 | 2 | 1 | 3  | 0  | Actinobacteria  | Oryzihumus        | RG-Bac77 | SAMN01729430 |
| 0  | 0 | 0 | 0 | 0  | 3  | Proteobacteria  | Pseudomonas       | RG-Bac78 | SAMN01729431 |
| 0  | 0 | 0 | 0 | 0  | 2  | Proteobacteria  | Thioalkalivibrio  | RG-Bac79 | SAMN01729432 |
| 1  | 0 | 0 | 0 | 0  | 0  | Proteobacteria  | Legionella        | RG-Bac80 | SAMN01729433 |



|     |   |    |   |   |   |                     |                      |           |              |
|-----|---|----|---|---|---|---------------------|----------------------|-----------|--------------|
| 0   | 0 | 0  | 0 | 0 | 1 | Proteobacteria      | Thiohalocapsa        | RG-Bac81  | SAMN01729434 |
| 133 | 0 | 0  | 0 | 0 | 0 | Aquificae           | Sulfurihydrogenibium | RG-Bac82  | SAMN01729435 |
| 11  | 0 | 0  | 0 | 0 | 0 | Proteobacteria      | Sulfuricurvum        | RG-Bac83  | SAMN01729436 |
| 3   | 0 | 0  | 0 | 0 | 0 | Proteobacteria      | Thiobacillus         | RG-Bac84  | SAMN01729437 |
| 8   | 0 | 0  | 0 | 0 | 0 | Proteobacteria      | Haemophilus          | RG-Bac85  | SAMN01729438 |
| 8   | 0 | 6  | 0 | 1 | 0 | Proteobacteria      | Sphingomonas         | RG-Bac86  | SAMN01729439 |
| 5   | 0 | 5  | 0 | 2 | 0 | Proteobacteria      | Gluconacetobacter    | RG-Bac87  | SAMN01729440 |
| 6   | 0 | 0  | 0 | 0 | 0 | Proteobacteria      | Nitrospina           | RG-Bac88  | SAMN01729441 |
| 5   | 0 | 0  | 0 | 0 | 0 | Firmicutes          | Lactobacillus        | RG-Bac89  | SAMN01729442 |
| 2   | 0 | 0  | 0 | 0 | 0 | Tenericutes         | Spiroplasma          | RG-Bac90  | SAMN01729443 |
| 1   | 0 | 0  | 0 | 0 | 0 | Proteobacteria      | Achromobacter        | RG-Bac91  | SAMN01729444 |
| 1   | 0 | 0  | 0 | 0 | 0 | Deinococcus-Thermus | Thermus              | RG-Bac92  | SAMN01729445 |
| 2   | 0 | 0  | 0 | 0 | 0 | Proteobacteria      | Nitrospina           | RG-Bac93  | SAMN01729446 |
| 1   | 0 | 0  | 0 | 0 | 0 | Proteobacteria      | Phenylobacterium     | RG-Bac94  | SAMN01729447 |
| 1   | 0 | 0  | 0 | 0 | 0 | Proteobacteria      | Rhizobacter          | RG-Bac95  | SAMN01729448 |
| 1   | 0 | 0  | 0 | 0 | 0 | Proteobacteria      | Sphingomonas         | RG-Bac96  | SAMN01729449 |
| 1   | 0 | 0  | 0 | 0 | 0 | Nitrospirae         | Nitrospira           | RG-Bac97  | SAMN01729450 |
| 1   | 0 | 0  | 0 | 0 | 0 | Aquificae           | Thermocrinis         | RG-Bac98  | SAMN01729451 |
| 1   | 0 | 0  | 0 | 0 | 0 | Nitrospira          | Nitrospira           | RG-Bac99  | SAMN01729452 |
| 1   | 0 | 0  | 0 | 0 | 0 | Bacteroidetes       | Sediminibacterium    | RG-Bac100 | SAMN01729453 |
| 1   | 0 | 11 | 0 | 1 | 0 | Deinococcus-Thermus | Deinococcus          | RG-Bac101 | SAMN01729454 |
| 1   | 0 | 0  | 0 | 0 | 0 | Acidobacteria       | Acidobacterium       | RG-Bac102 | SAMN01729455 |
| 1   | 0 | 0  | 0 | 0 | 0 | Proteobacteria      | Devosia              | RG-Bac103 | SAMN01729456 |
| 1   | 0 | 0  | 0 | 0 | 0 | Proteobacteria      | Alcaligenaceae       | RG-Bac104 | SAMN01729457 |
| 0   | 0 | 5  | 0 | 0 | 0 | Gemmatimonadetes    | Gemmatimonas         | RG-Bac105 | SAMN01729458 |
| 0   | 0 | 3  | 0 | 0 | 0 | Verrucomicrobia     | Luteolibacter        | RG-Bac106 | SAMN01729459 |
| 0   | 0 | 1  | 0 | 0 | 0 | Proteobacteria      | Lysobacter           | RG-Bac107 | SAMN01729460 |
| 0   | 0 | 1  | 0 | 0 | 0 | Firmicutes          | Paenibacillus        | RG-Bac108 | SAMN01729461 |
| 0   | 0 | 0  | 0 | 1 | 0 | Proteobacteria      | Hermiimonas          | RG-Bac109 | SAMN01729462 |
| 0   | 0 | 1  | 0 | 0 | 0 | Bacteroidetes       | Rudanella            | RG-Bac110 | SAMN01729463 |
| 0   | 0 | 1  | 0 | 0 | 0 | Proteobacteria      | Bdellovibrio         | RG-Bac111 | SAMN01729464 |
| 0   | 0 | 2  | 0 | 0 | 0 | Proteobacteria      | Methylotenera        | RG-Bac112 | SAMN01729465 |
| 0   | 0 | 0  | 0 | 1 | 0 | Bacteroidetes       | Hymenobacter         | RG-Bac113 | SAMN01729466 |
| 0   | 0 | 1  | 0 | 0 | 0 | Firmicutes          | Erysipelothrix       | RG-Bac114 | SAMN01729467 |
| 0   | 0 | 1  | 0 | 0 | 0 | Proteobacteria      | Aquicella            | RG-Bac115 | SAMN01729468 |
| 0   | 0 | 1  | 0 | 0 | 0 | Planctomycetes      | Singulisphaera       | RG-Bac116 | SAMN01729469 |
| 0   | 0 | 1  | 0 | 0 | 0 | Proteobacteria      | Sandarakinorhabdus   | RG-Bac117 | SAMN01729470 |
| 0   | 0 | 1  | 0 | 0 | 0 | Proteobacteria      | Phaselicystis        | RG-Bac118 | SAMN01729471 |
| 0   | 0 | 1  | 0 | 0 | 0 | Actinobacteria      | Nocardioides         | RG-Bac119 | SAMN01729472 |
| 0   | 0 | 0  | 0 | 2 | 0 | Proteobacteria      | Massilia             | RG-Bac120 | SAMN01729473 |

<sup>a</sup>Closest cultured representative as determined by BLASTn

<sup>b</sup>Representative sequence

Supplemental Table 4. Frequency, accession numbers and affiliations of eukaryal 18S rRNA and rDNA sequences.

| Number of OTUs |                 |                |                 |          |           | Taxonomy <sup>a</sup> |                                                    | Rep Seq <sup>b</sup> | Accession Number |
|----------------|-----------------|----------------|-----------------|----------|-----------|-----------------------|----------------------------------------------------|----------------------|------------------|
| Subglacial DNA | Subglacial cDNA | Cryoconite DNA | Cryoconite cDNA | Snow DNA | Snow cDNA | Phylum                | Genus                                              |                      |                  |
| 2              | 0               | 0              | 0               | 0        | 0         | Magnoliophyta         | <i>Musa acuminata</i> subsp. <i>burmannicoides</i> | RG-Euk1              | SAMN01729474     |
| 3              | 4               | 6              | 0               | 1        | 0         | Ciliophora            | <i>Spathidium</i> sp. 2 VBOEF2011                  | RG-Euk2              | SAMN01729475     |
| 2              | 8               | 303            | 350             | 330      | 489       | Chlorophyta           | <i>Chlamydomonas</i> sp. CCAP 11/158               | RG-Euk3              | SAMN01729476     |
| 80             | 81              | 17             | 0               | 0        | 0         | Ciliophora            | <i>Tokophrya lemnae</i>                            | RG-Euk4              | SAMN01729477     |
| 53             | 16              | 4              | 0               | 109      | 67        | Basidiomycota         | <i>Leucosporidium</i> sp. AY30                     | RG-Euk5              | SAMN01729478     |
| 144            | 141             | 44             | 16              | 2        | 0         | Ciliophora            | <i>Amphisiella magnigranulosa</i>                  | RG-Euk6              | SAMN01729479     |
| 8              | 7               | 0              | 0               | 1        | 0         | Ciliophora            | <i>Amphileptus aescetae</i>                        | RG-Euk7              | SAMN01729480     |
| 7              | 37              | 51             | 93              | 1        | 33        | Chlorophyta           | <i>Diplosphaera</i> sp. W1118                      | RG-Euk8              | SAMN01729481     |
| 11             | 1               | 0              | 0               | 0        | 0         | Streptophyta          | <i>Taraxacum koksaghyz</i>                         | RG-Euk9              | SAMN01729482     |
| 9              | 0               | 0              | 0               | 0        | 0         | Ciliophora            | <i>Lacrymaria marina</i>                           | RG-Euk10             | SAMN01729483     |
| 3              | 92              | 8              | 25              | 1        | 0         | Chlorophyta           | <i>Neosporangium gelatinosum</i>                   | RG-Euk11             | SAMN01729484     |
| 6              | 0               | 9              | 0               | 0        | 0         | Ciliophora            | <i>Stokesia vernalis</i>                           | RG-Euk12             | SAMN01729485     |
| 5              | 0               | 0              | 0               | 1        | 0         | Ciliophora            | <i>Tiarina fusa</i>                                | RG-Euk13             | SAMN01729486     |
| 6              | 0               | 3              | 0               | 0        | 77        | Ciliophora            | <i>Stokesia vernalis</i>                           | RG-Euk14             | SAMN01729487     |
| 66             | 61              | 72             | 98              | 2        | 0         | Chlorophyta           | <i>Pseudendocloniopsis botryoides</i>              | RG-Euk15             | SAMN01729488     |
| 23             | 14              | 13             | 20              | 26       | 34        | Chlorophyta           | <i>Chloromonas nivalis</i>                         | RG-Euk16             | SAMN01729489     |
| 11             | 12              | 0              | 5               | 3        | 0         | Chlorophyta           | <i>Pseudendocloniopsis botryoides</i>              | RG-Euk17             | SAMN01729490     |
| 4              | 0               | 3              | 0               | 0        | 0         | Ciliophora            | <i>Blepharisma japonicum</i>                       | RG-Euk18             | SAMN01729491     |
| 5              | 7               | 0              | 0               | 1        | 0         | Amoebozoa             | <i>Nolandella</i> sp. ATCC 50913                   | RG-Euk19             | SAMN01729492     |
| 41             | 74              | 0              | 0               | 1        | 0         | Ciliophora            | <i>Sterkiella cavicola</i>                         | RG-Euk20             | SAMN01729493     |
| 6              | 0               | 1              | 0               | 0        | 0         | Oomycota              | <i>Albugo laibachii</i> Nc14                       | RG-Euk21             | SAMN01729494     |
| 6              | 0               | 1              | 0               | 0        | 0         | Magnoliophyta         | <i>Musa acuminata</i> subsp. <i>burmannicoides</i> | RG-Euk22             | SAMN01729495     |
| 6              | 10              | 1              | 0               | 0        | 0         | Magnoliophyta         | <i>Lolium multiflorum</i>                          | RG-Euk23             | SAMN01729496     |
| 2              | 0               | 1              | 0               | 0        | 0         | Neocallimastigomycota | <i>Piromyces</i> sp. PGL25                         | RG-Euk24             | SAMN01729497     |
| 7              | 0               | 1              | 0               | 0        | 0         | Ciliophora            | <i>Stokesia vernalis</i>                           | RG-Euk25             | SAMN01729498     |
| 9              | 0               | 3              | 0               | 0        | 0         | Ciliophora            | <i>Stokesia vernalis</i>                           | RG-Euk26             | SAMN01729499     |
| 2              | 2               | 0              | 3               | 0        | 0         | Arthropoda            | <i>Demodex folliculorum</i> isolate Df-5           | RG-Euk27             | SAMN01729500     |
| 3              | 0               | 0              | 0               | 0        | 0         | Ciliophora            | <i>Stokesia vernalis</i>                           | RG-Euk28             | SAMN01729501     |
| 5              | 0               | 0              | 4               | 0        | 0         | Ascomycota            | <i>Verticillium dahliae</i>                        | RG-Euk29             | SAMN01729502     |
| 6              | 10              | 1              | 0               | 1        | 0         | Ciliophora            | <i>Anteholosticha monilata</i>                     | RG-Euk30             | SAMN01729503     |
| 128            | 14              | 99             | 45              | 1        | 0         | Cercozoa              | <i>Capsellina</i> sp. ATCC 50039                   | RG-Euk31             | SAMN01729504     |
| 2              | 23              | 0              | 3               | 1        | 0         | Chlorophyta           | <i>Scenedesmus obliquus</i>                        | RG-Euk32             | SAMN01729505     |

|    |    |     |    |     |   |                 |                                          |          |              |
|----|----|-----|----|-----|---|-----------------|------------------------------------------|----------|--------------|
| 66 | 2  | 0   | 0  | 1   | 0 | Cercozoa        | Protaspis grandis                        | RG-Euk33 | SAMN01729506 |
| 3  | 0  | 0   | 0  | 1   | 0 | Basidiomycota   | Ustilago tritici isolate AFTOL-ID 1398   | RG-Euk34 | SAMN01729507 |
| 4  | 0  | 0   | 0  | 1   | 0 | Basidiomycota   | Pleurotus ostreatus                      | RG-Euk35 | SAMN01729508 |
| 2  | 0  | 0   | 0  | 0   | 0 | Amoebozoa       | Saccamoeba limax                         | RG-Euk36 | SAMN01729509 |
| 3  | 0  | 3   | 0  | 0   | 0 | Ciliophora      | Cryptocaryon irritans                    | RG-Euk37 | SAMN01729510 |
| 1  | 0  | 3   | 0  | 0   | 0 | Ciliophora      | Homalogastra setosa isolate GT1          | RG-Euk38 | SAMN01729511 |
| 2  | 0  | 0   | 0  | 0   | 5 | Chlorophyta     | Chlamydomonas sp. CCAP 11/159            | RG-Euk39 | SAMN01729512 |
| 2  | 0  | 0   | 0  | 0   | 0 | Choanozoa       | Acanthoeca spectabilis                   | RG-Euk40 | SAMN01729513 |
| 5  | 6  | 0   | 0  | 0   | 0 | Cercozoa        | Protaspis grandis                        | RG-Euk41 | SAMN01729514 |
| 4  | 0  | 0   | 0  | 0   | 0 | Basidiomycota   | Malassezia pachydermatis                 | RG-Euk42 | SAMN01729515 |
| 0  | 1  | 0   | 0  | 0   | 0 | Chytridiomycota | Hyaloraphidium curvatum strain SAG 235-1 | RG-Euk43 | SAMN01729516 |
| 4  | 5  | 0   | 2  | 0   | 0 | Cercozoa        | Capsellina sp. ATCC 50039                | RG-Euk44 | SAMN01729517 |
| 4  | 0  | 0   | 0  | 0   | 0 | Alveolata       | Blepharisma japonicum                    | RG-Euk45 | SAMN01729518 |
| 2  | 0  | 0   | 0  | 0   | 0 | Amoebozoa       | Platyamoeba sp. strain VV/I              | RG-Euk46 | SAMN01729519 |
| 1  | 0  | 0   | 0  | 0   | 0 | Amoebozoa       | Vannella aberdonica strain ATCC 50815    | RG-Euk47 | SAMN01729520 |
| 0  | 3  | 0   | 0  | 0   | 0 | Chlorophyta     | Pseudendocloniopsis botryoides           | RG-Euk48 | SAMN01729521 |
| 3  | 0  | 0   | 0  | 0   | 0 | Basidiomycota   | Pseudozyma aphidis strain JCM 10318      | RG-Euk49 | SAMN01729522 |
| 1  | 0  | 0   | 0  | 0   | 0 | Chytridiomycota | Chytridiales sp. AF021                   | RG-Euk50 | SAMN01729523 |
| 1  | 2  | 1   | 0  | 0   | 0 | Chytridiomycota | Spizellomyces sp. NBRC 106283            | RG-Euk51 | SAMN01729524 |
| 2  | 0  | 0   | 0  | 0   | 0 | Amoebozoa       | Saccamoeba limax                         | RG-Euk52 | SAMN01729525 |
| 87 | 78 | 153 | 31 | 160 | 0 | Cercozoa        | Cercozoa sp. CC-2009d                    | RG-Euk53 | SAMN01729526 |
| 4  | 1  | 1   | 0  | 1   | 0 | Chytridiomycota | Rhizophyidium elyensis                   | RG-Euk54 | SAMN01729527 |
| 1  | 9  | 0   | 0  | 1   | 0 | Chlorophyta     | Micractinium sp. CCAP 248/2              | RG-Euk55 | SAMN01729528 |
| 1  | 0  | 0   | 0  | 0   | 0 | Ciliophora      | Tokophrya lemnarum                       | RG-Euk56 | SAMN01729529 |
| 0  | 0  | 0   | 0  | 1   | 0 | Cercozoa        | Protaspis grandis                        | RG-Euk57 | SAMN01729530 |
| 2  | 0  | 0   | 0  | 0   | 0 | Alveolata       | Blepharisma japonicum                    | RG-Euk58 | SAMN01729531 |
| 1  | 0  | 1   | 0  | 0   | 0 | Ciliophora      | Stokesia vernalis                        | RG-Euk59 | SAMN01729532 |
| 1  | 0  | 2   | 0  | 0   | 0 | Ciliophora      | Anophyroides haemophila                  | RG-Euk60 | SAMN01729533 |
| 1  | 0  | 2   | 0  | 0   | 0 | Ciliophora      | Stokesia vernalis                        | RG-Euk61 | SAMN01729534 |
| 2  | 0  | 5   | 0  | 0   | 0 | Ciliophora      | Frontonia sp. CXR08040803                | RG-Euk62 | SAMN01729535 |
| 3  | 0  | 0   | 0  | 0   | 0 | Amoebozoa       | Saccamoeba limax                         | RG-Euk63 | SAMN01729536 |
| 2  | 3  | 0   | 0  | 0   | 0 | Cercozoa        | Protaspis grandis                        | RG-Euk64 | SAMN01729537 |
| 1  | 0  | 8   | 5  | 1   | 0 | Cercozoa        | Capsellina sp. ATCC 50039                | RG-Euk65 | SAMN01729538 |
| 3  | 1  | 7   | 7  | 1   | 1 | Basidiomycota   | Leucosporidium sp. AY30                  | RG-Euk66 | SAMN01729539 |
| 1  | 0  | 0   | 0  | 0   | 0 | Amoebozoa       | Saccamoeba limax                         | RG-Euk67 | SAMN01729540 |

|   |   |    |    |   |   |                  |                                        |           |              |
|---|---|----|----|---|---|------------------|----------------------------------------|-----------|--------------|
| 0 | 1 | 3  | 14 | 3 | 6 | Chlorophyta      | Chloromonas nivalis                    | RG-Euk68  | SAMN01729541 |
| 0 | 1 | 0  | 0  | 0 | 0 | Cercozoa         | Capsellina sp. ATCC 50039              | RG-Euk69  | SAMN01729542 |
| 2 | 9 | 0  | 0  | 1 | 0 | Cercozoa         | Capsellina sp. ATCC 50039              | RG-Euk70  | SAMN01729543 |
| 1 | 0 | 0  | 0  | 0 | 0 | Ciliophora       | Stokesia vernalis                      | RG-Euk71  | SAMN01729544 |
| 0 | 0 | 4  | 0  | 0 | 0 | Ciliophora       | Stokesia vernalis                      | RG-Euk72  | SAMN01729545 |
| 2 | 0 | 0  | 0  | 0 | 0 | Chytridiomycota  | Powellomyces variabilis strain BK91-11 | RG-Euk73  | SAMN01729546 |
| 2 | 0 | 0  | 0  | 0 | 0 | Ciliophora       | Mykophagophrys terricola               | RG-Euk74  | SAMN01729547 |
| 1 | 0 | 3  | 0  | 0 | 0 | Ciliophora       | Colpoda sp. MD-2011                    | RG-Euk75  | SAMN01729548 |
| 3 | 4 | 0  | 1  | 3 | 0 | Cercozoa         | Capsellina sp. ATCC 50039              | RG-Euk76  | SAMN01729549 |
| 4 | 0 | 0  | 0  | 0 | 0 | Ascomycota       | Hemicarpenetes paradoxus               | RG-Euk77  | SAMN01729550 |
| 1 | 0 | 0  | 0  | 0 | 0 | Amoebozoa        | Saccamoeba limax                       | RG-Euk78  | SAMN01729551 |
| 1 | 1 | 0  | 0  | 1 | 1 | Cercozoa         | Bodomorpha sp. HFCC57                  | RG-Euk79  | SAMN01729552 |
| 1 | 0 | 0  | 0  | 0 | 0 | Ciliophora       | Mykophagophrys terricola               | RG-Euk80  | SAMN01729553 |
| 1 | 2 | 0  | 0  | 1 | 1 | Cercozoa         | Assulina muscorum                      | RG-Euk81  | SAMN01729554 |
| 1 | 0 | 0  | 0  | 0 | 0 | Cercozoa         | Protaspis grandis                      | RG-Euk82  | SAMN01729555 |
| 0 | 2 | 0  | 0  | 8 | 0 | Cercozoa         | Protaspis grandis                      | RG-Euk83  | SAMN01729556 |
| 0 | 0 | 14 | 0  | 0 | 0 | Ciliophora       | Stokesia vernalis 18S                  | RG-Euk84  | SAMN01729557 |
| 0 | 1 | 0  | 0  | 0 | 0 | Apicomplexa      | Eimeria acervulina                     | RG-Euk85  | SAMN01729558 |
| 1 | 2 | 0  | 7  | 3 | 0 | Chlorophyta      | Pseudendocloniopsis botryoides         | RG-Euk86  | SAMN01729559 |
| 0 | 1 | 1  | 3  | 1 | 5 | Basidiomycota    | Leucosporidium sp. AY30                | RG-Euk87  | SAMN01729560 |
| 1 | 2 | 0  | 0  | 1 | 0 | Ascomycota       | Thelebolus globosus                    | RG-Euk88  | SAMN01729561 |
| 0 | 0 | 0  | 0  | 3 | 0 | Cercozoa         | Protaspis grandis                      | RG-Euk89  | SAMN01729562 |
| 1 | 0 | 0  | 0  | 0 | 0 | Cercozoa         | Cercomonas sp. Tempisque               | RG-Euk90  | SAMN01729563 |
| 0 | 2 | 0  | 0  | 1 | 0 | Cercozoa         | Protaspis grandis                      | RG-Euk91  | SAMN01729564 |
| 1 | 0 | 2  | 0  | 0 | 0 | Ciliophora       | Stokesia vernalis                      | RG-Euk92  | SAMN01729565 |
| 0 | 1 | 0  | 0  | 0 | 0 | Amoebozoa        | Vannella sp. COHH 61                   | RG-Euk93  | SAMN01729566 |
| 0 | 0 | 3  | 0  | 0 | 0 | Ciliophora       | Colpoda sp. MD-2011                    | RG-Euk94  | SAMN01729567 |
| 0 | 3 | 0  | 1  | 1 | 0 | Cercozoa         | Capsellina sp. ATCC 50039              | RG-Euk95  | SAMN01729568 |
| 0 | 0 | 0  | 0  | 2 | 1 | Cercozoa         | Bodomorpha sp. HFCC57                  | RG-Euk96  | SAMN01729569 |
| 0 | 4 | 0  | 0  | 1 | 0 | Ochrophyta       | Xanthophyceae sp. IX3                  | RG-Euk97  | SAMN01729570 |
| 1 | 0 | 0  | 0  | 0 | 0 | Cercozoa         | Capsellina sp. ATCC 50039              | RG-Euk98  | SAMN01729571 |
| 0 | 0 | 0  | 3  | 0 | 0 | Heterokontophyta | Hydrurus foetidus                      | RG-Euk99  | SAMN01729572 |
| 1 | 0 | 0  | 0  | 0 | 0 | Amoebozoa        | Schizoplasmodiopsis vulgaris           | RG-Euk100 | SAMN01729573 |
| 2 | 0 | 6  | 0  | 0 | 0 | Ciliophora       | Oxytricha sp. Ox_L1                    | RG-Euk101 | SAMN01729574 |
| 0 | 7 | 0  | 0  | 1 | 0 | Ascomycota       | Taphrina vestergrenii                  | RG-Euk102 | SAMN01729575 |

|   |   |   |   |   |   |                 |                                            |           |              |
|---|---|---|---|---|---|-----------------|--------------------------------------------|-----------|--------------|
| 1 | 0 | 0 | 0 | 0 | 0 | Amoebozoa       | Saccamoeba limax                           | RG-Euk103 | SAMN01729576 |
| 1 | 0 | 0 | 0 | 0 | 0 | Basidiomycota   | Leucosporidium sp. AY30                    | RG-Euk104 | SAMN01729577 |
| 0 | 6 | 0 | 0 | 1 | 1 | Cercozoa        | Bodomorpha sp. HFCC57                      | RG-Euk105 | SAMN01729578 |
| 3 | 0 | 0 | 0 | 0 | 0 | Cercozoa        | Cercomonas sp. Tempisque                   | RG-Euk106 | SAMN01729579 |
| 1 | 0 | 0 | 0 | 0 | 0 | Amoebozoa       | Saccamoeba limax                           | RG-Euk107 | SAMN01729580 |
| 1 | 0 | 0 | 0 | 0 | 0 | Amoebozoa       | Entamoeba histolytica                      | RG-Euk108 | SAMN01729581 |
| 0 | 1 | 0 | 0 | 0 | 0 | Amoebozoa       | Vannella aberdonica strain ATCC 50815      | RG-Euk109 | SAMN01729582 |
| 0 | 2 | 0 | 0 | 0 | 1 | Cercozoa        | Bodomorpha sp. HFCC57                      | RG-Euk110 | SAMN01729583 |
| 0 | 0 | 6 | 0 | 0 | 0 | Ciliophora      | Stokesia vernalis                          | RG-Euk111 | SAMN01729584 |
| 0 | 2 | 0 | 0 | 1 | 0 | Chlorophyta     | Neosporangiococcum gelatinosum             | RG-Euk112 | SAMN01729585 |
| 1 | 0 | 0 | 0 | 0 | 0 | Amoebozoa       | Saccamoeba limax                           | RG-Euk113 | SAMN01729586 |
| 0 | 1 | 0 | 0 | 0 | 0 | Chlorophyta     | Neosporangiococcum gelatinosum             | RG-Euk114 | SAMN01729587 |
| 1 | 0 | 0 | 0 | 0 | 0 | Amoebozoa       | Saccamoeba limax                           | RG-Euk115 | SAMN01729588 |
| 0 | 2 | 0 | 4 | 1 | 1 | Basidiomycota   | Leucosporidium sp. AY30                    | RG-Euk116 | SAMN01729589 |
| 0 | 0 | 0 | 0 | 1 | 0 | Chytridiomycota | Spizellomyces sp. NBRC 106283              | RG-Euk117 | SAMN01729590 |
| 0 | 0 | 0 | 0 | 1 | 3 | Cercozoa        | Bodomorpha sp. HFCC57                      | RG-Euk118 | SAMN01729591 |
| 0 | 1 | 0 | 0 | 1 | 0 | Cercozoa        | Capsellina sp. ATCC 50039                  | RG-Euk119 | SAMN01729592 |
| 1 | 1 | 0 | 0 | 0 | 0 | Cercozoa        | Heteromita globosa                         | RG-Euk120 | SAMN01729593 |
| 1 | 1 | 0 | 1 | 1 | 0 | Cercozoa        | Protaspis grandis                          | RG-Euk121 | SAMN01729594 |
| 0 | 2 | 0 | 0 | 1 | 0 | Cercozoa        | Heteromita globosa                         | RG-Euk122 | SAMN01729595 |
| 0 | 0 | 0 | 0 | 0 | 6 | Cercozoa        | Bodomorpha sp. HFCC57                      | RG-Euk123 | SAMN01729596 |
| 0 | 0 | 0 | 0 | 1 | 0 | Cercozoa        | Protaspis grandis                          | RG-Euk124 | SAMN01729597 |
| 0 | 0 | 0 | 0 | 1 | 0 | Cercozoa        | Protaspis grandis                          | RG-Euk125 | SAMN01729598 |
| 0 | 1 | 0 | 0 | 0 | 0 | Cercozoa        | Protaspis sp. CC-2009b                     | RG-Euk126 | SAMN01729599 |
| 1 | 0 | 0 | 0 | 0 | 0 | Cercozoa        | Protaspis sp. CC-2009b                     | RG-Euk127 | SAMN01729600 |
| 1 | 0 | 0 | 0 | 0 | 0 | Chytridiomycota | Rhizophydium elyensis isolate AFTOL-ID 693 | RG-Euk128 | SAMN01729601 |
| 0 | 0 | 0 | 0 | 1 | 1 | Chlorophyta     | Chlorococcalean sp. 84/98                  | RG-Euk129 | SAMN01729602 |
| 0 | 0 | 1 | 0 | 0 | 0 | Ciliophora      | Homalogastra setosa isolate GT1            | RG-Euk130 | SAMN01729603 |
| 0 | 1 | 0 | 0 | 0 | 8 | Cercozoa        | Bodomorpha sp. HFCC57                      | RG-Euk131 | SAMN01729604 |
| 1 | 0 | 0 | 0 | 0 | 0 | Amoebozoa       | Saccamoeba limax                           | RG-Euk132 | SAMN01729605 |
| 1 | 0 | 0 | 0 | 0 | 0 | Ciliophora      | Stokesia vernalis                          | RG-Euk133 | SAMN01729606 |
| 0 | 0 | 0 | 0 | 1 | 0 | Cercozoa        | Protaspis grandis                          | RG-Euk134 | SAMN01729607 |
| 0 | 1 | 0 | 0 | 1 | 6 | Cercozoa        | Bodomorpha sp. HFCC57                      | RG-Euk135 | SAMN01729608 |
| 1 | 0 | 0 | 0 | 0 | 0 | Cercozoa        | Bodomorpha sp. HFCC57                      | RG-Euk136 | SAMN01729609 |
| 0 | 0 | 0 | 1 | 0 | 1 | Basidiomycota   | Kriegeria eriophori isolate AFTOL-ID 886   | RG-Euk137 | SAMN01729610 |

|   |   |    |   |   |    |                      |                                             |           |              |
|---|---|----|---|---|----|----------------------|---------------------------------------------|-----------|--------------|
| 1 | 0 | 0  | 0 | 0 | 0  | Ciliophora           | Stokesia vernalis                           | RG-Euk138 | SAMN01729611 |
| 0 | 0 | 0  | 0 | 0 | 1  | Chlorophyta          | Chlorococcalean sp. 84/98                   | RG-Euk139 | SAMN01729612 |
| 0 | 1 | 0  | 0 | 3 | 0  | Chytridiomycota      | Chytridiales sp. AF021                      | RG-Euk140 | SAMN01729613 |
| 0 | 0 | 0  | 0 | 1 | 0  | Amoebozoa            | Nolandella sp. ATCC 50913                   | RG-Euk141 | SAMN01729614 |
| 1 | 0 | 0  | 0 | 0 | 0  | Amoebozoa            | Vannella sp. JVW-2011                       | RG-Euk142 | SAMN01729615 |
| 0 | 0 | 15 | 0 | 0 | 0  | Alveolata            | Blepharisma japonicum                       | RG-Euk143 | SAMN01729616 |
| 0 | 1 | 0  | 0 | 0 | 0  | Cercozoa             | Heteromita globosa                          | RG-Euk144 | SAMN01729617 |
| 1 | 0 | 0  | 0 | 0 | 0  | Alveolata            | Blepharisma japonicum                       | RG-Euk145 | SAMN01729618 |
| 0 | 0 | 0  | 0 | 1 | 0  | Cercozoa             | Capsellina sp. ATCC 50039                   | RG-Euk146 | SAMN01729619 |
| 0 | 0 | 0  | 0 | 2 | 3  | Cercozoa             | Bodomorpha sp. HFCC57                       | RG-Euk147 | SAMN01729620 |
| 0 | 7 | 0  | 0 | 0 | 0  | Blastocladiomycota   | Allomyces arbuscula strain Brazil 2         | RG-Euk148 | SAMN01729621 |
| 0 | 5 | 0  | 0 | 0 | 0  | Ascomycota           | Melastiza cornubiensis                      | RG-Euk149 | SAMN01729622 |
| 0 | 6 | 0  | 0 | 0 | 0  | Fungi incertae sedis | Mortierella alpina M23                      | RG-Euk150 | SAMN01729623 |
| 0 | 2 | 0  | 0 | 1 | 0  | Cercozoa             | Thaumatomonas seravini                      | RG-Euk151 | SAMN01729624 |
| 0 | 3 | 0  | 0 | 1 | 3  | Ascomycota           | Penidiella columbiana strain CBS 486.80     | RG-Euk152 | SAMN01729625 |
| 0 | 2 | 0  | 0 | 0 | 0  | Chytridiomycota      | Kappamyces laurelensis                      | RG-Euk153 | SAMN01729626 |
| 0 | 1 | 0  | 0 | 2 | 14 | Basidiomycota        | Leucosporidium sp. AY30                     | RG-Euk154 | SAMN01729627 |
| 0 | 3 | 0  | 2 | 1 | 0  | Blastocladiomycota   | Allomyces arbuscula strain Brazil 2         | RG-Euk155 | SAMN01729628 |
| 0 | 5 | 0  | 0 | 2 | 0  | Chytridiomycota      | Boothiomycetes macroporosum strain PL AUS 2 | RG-Euk156 | SAMN01729629 |
| 0 | 2 | 0  | 0 | 0 | 0  | Blastocladiomycota   | Allomyces arbuscula strain Brazil 2         | RG-Euk157 | SAMN01729630 |
| 0 | 3 | 0  | 0 | 0 | 4  | Cercozoa             | Bodomorpha sp. HFCC57                       | RG-Euk158 | SAMN01729631 |
| 0 | 3 | 0  | 0 | 0 | 0  | Cercozoa             | Placocista sp. CC-Grouse Mountain           | RG-Euk159 | SAMN01729632 |
| 0 | 4 | 0  | 0 | 0 | 0  | Ochrophyta           | Xanthonema sp. 395                          | RG-Euk160 | SAMN01729633 |
| 0 | 1 | 0  | 0 | 1 | 0  | Chlorophyta          | Neosporangiococcum gelatinosum              | RG-Euk161 | SAMN01729634 |
| 0 | 2 | 0  | 0 | 1 | 0  | Basidiomycota        | Walleimia sebi                              | RG-Euk162 | SAMN01729635 |
| 0 | 1 | 0  | 0 | 1 | 0  | Cercozoa             | Protaspis grandis                           | RG-Euk163 | SAMN01729636 |
| 0 | 0 | 6  | 0 | 0 | 1  | Basidiomycota        | Leucosporidium sp. AY30                     | RG-Euk164 | SAMN01729637 |
| 0 | 3 | 0  | 5 | 1 | 0  | Cercozoa             | Capsellina sp. ATCC 50039                   | RG-Euk165 | SAMN01729638 |
| 0 | 3 | 0  | 0 | 1 | 0  | Cercozoa             | Capsellina sp. ATCC 50039                   | RG-Euk166 | SAMN01729639 |
| 0 | 1 | 0  | 0 | 0 | 0  | Amoebozoa            | Soliformovum expulsus                       | RG-Euk167 | SAMN01729640 |
| 0 | 1 | 0  | 0 | 1 | 0  | Chytridiomycota      | Chytridiales sp. AF017                      | RG-Euk168 | SAMN01729641 |
| 0 | 2 | 0  | 0 | 2 | 0  | Chytridiomycota      | Rhizidium endosporangiatum                  | RG-Euk169 | SAMN01729642 |
| 0 | 0 | 0  | 0 | 2 | 0  | Glomeromycota        | Scutellospora calospora                     | RG-Euk170 | SAMN01729643 |
| 0 | 5 | 0  | 0 | 0 | 0  | Chytridiomycota      | Rhizophydium elyensis                       | RG-Euk171 | SAMN01729644 |
| 0 | 1 | 0  | 0 | 0 | 0  | Choanozoa            | Paramoebidium sp. CMJ-2003                  | RG-Euk172 | SAMN01729645 |

|   |   |   |    |   |   |                      |                                                    |           |              |
|---|---|---|----|---|---|----------------------|----------------------------------------------------|-----------|--------------|
| 0 | 1 | 0 | 0  | 0 | 0 | Chlorophyta          | <i>Vitreochlamys incisa</i>                        | RG-Euk173 | SAMN01729646 |
| 0 | 1 | 0 | 0  | 0 | 0 | Cercozoa             | <i>Thaumatomonas seravini</i>                      | RG-Euk174 | SAMN01729647 |
| 0 | 2 | 0 | 0  | 0 | 0 | Fungi incertae sedis | <i>Cochlonema euryblastum</i>                      | RG-Euk175 | SAMN01729648 |
| 0 | 0 | 0 | 0  | 1 | 0 | Ascomycota           | <i>Sarcinomyces</i> sp. MA 4760                    | RG-Euk176 | SAMN01729649 |
| 0 | 1 | 0 | 0  | 0 | 0 | Fungi incertae sedis | <i>Mortierella alpina</i> M23                      | RG-Euk177 | SAMN01729650 |
| 0 | 0 | 0 | 0  | 3 | 0 | Cercozoa             | <i>Thaumatomonas seravini</i>                      | RG-Euk178 | SAMN01729651 |
| 0 | 1 | 0 | 0  | 0 | 0 | Streptophyta         | <i>Ceratodon purpureus</i>                         | RG-Euk179 | SAMN01729652 |
| 0 | 0 | 0 | 0  | 1 | 0 | Cercozoa             | <i>Protaspis grandis</i>                           | RG-Euk180 | SAMN01729653 |
| 0 | 2 | 0 | 0  | 0 | 0 | Rhizopoda            | <i>Vampyrella pendula</i>                          | RG-Euk181 | SAMN01729654 |
| 0 | 0 | 0 | 2  | 2 | 0 | Cercozoa             | <i>Capsellina</i> sp. ATCC 50039                   | RG-Euk182 | SAMN01729655 |
| 0 | 1 | 0 | 0  | 0 | 0 | Blastocladiomycota   | <i>Allomyces arbuscula</i>                         | RG-Euk183 | SAMN01729656 |
| 0 | 0 | 0 | 0  | 1 | 0 | Cercozoa             | <i>Bodomorpha</i> sp. HFCC57                       | RG-Euk184 | SAMN01729657 |
| 0 | 2 | 0 | 0  | 1 | 0 | Ascomycota           | <i>Melanops</i> sp. CBS118.39                      | RG-Euk185 | SAMN01729658 |
| 0 | 2 | 0 | 7  | 1 | 0 | Cercozoa             | <i>Capsellina</i> sp. ATCC 50039                   | RG-Euk186 | SAMN01729659 |
| 0 | 1 | 0 | 0  | 0 | 0 | Cercozoa             | <i>Heteromita globosa</i>                          | RG-Euk187 | SAMN01729660 |
| 0 | 0 | 0 | 0  | 1 | 0 | Ascomycota           | <i>Acremonium recife</i>                           | RG-Euk188 | SAMN01729661 |
| 0 | 1 | 0 | 0  | 0 | 0 | Ochrophyta           | Botrydiopsidaceae sp. PAB 485                      | RG-Euk189 | SAMN01729662 |
| 0 | 1 | 0 | 0  | 0 | 0 | Cercozoa             | <i>Placocista</i> sp. CC-Grouse Mountain           | RG-Euk190 | SAMN01729663 |
| 0 | 1 | 0 | 20 | 4 | 0 | Cercozoa             | <i>Heteromita globosa</i>                          | RG-Euk191 | SAMN01729664 |
| 0 | 2 | 0 | 0  | 0 | 0 | Ciliophora           | <i>Anophyroides haemophila</i>                     | RG-Euk192 | SAMN01729665 |
| 0 | 1 | 0 | 0  | 0 | 0 | Basidiomycota        | <i>Septobasidium westoni</i>                       | RG-Euk193 | SAMN01729666 |
| 0 | 0 | 0 | 0  | 2 | 0 | Chytridiomycota      | Chytridiales sp. AF017                             | RG-Euk194 | SAMN01729667 |
| 0 | 2 | 0 | 0  | 0 | 0 | Amoebozoa            | <i>Soliformovum expulsum</i>                       | RG-Euk195 | SAMN01729668 |
| 0 | 0 | 0 | 0  | 1 | 0 | Cercozoa             | <i>Bodomorpha</i> sp. HFCC57                       | RG-Euk196 | SAMN01729669 |
| 0 | 1 | 0 | 0  | 0 | 0 | Basidiomycota        | <i>Rhizoctonia solani</i> isolate Q1               | RG-Euk197 | SAMN01729670 |
| 0 | 1 | 0 | 0  | 0 | 0 | Amoebozoa            | <i>Vannella</i> sp. COHH 61                        | RG-Euk198 | SAMN01729671 |
| 0 | 1 | 0 | 0  | 1 | 0 | Chytridiomycota      | <i>Spizellomyces</i> sp. NBRC 105423               | RG-Euk199 | SAMN01729672 |
| 0 | 0 | 0 | 0  | 1 | 0 | Chytridiomycota      | Chytridiales sp. AF017                             | RG-Euk200 | SAMN01729673 |
| 0 | 1 | 0 | 0  | 0 | 1 | Ascomycota           | <i>Phialocephala</i> sp. 7 CRG-2008 strain TS_97_0 | RG-Euk201 | SAMN01729674 |
| 0 | 1 | 0 | 0  | 0 | 0 | Chlorophyta          | <i>Kirchneriella phaseoliformis</i>                | RG-Euk202 | SAMN01729675 |
| 0 | 1 | 0 | 0  | 2 | 0 | Rhizopoda            | <i>Vampyrella pendula</i>                          | RG-Euk203 | SAMN01729676 |
| 0 | 0 | 0 | 0  | 1 | 0 | Chytridiomycota      | Chytridiales sp. AF017                             | RG-Euk204 | SAMN01729677 |
| 0 | 2 | 0 | 0  | 2 | 3 | Cercozoa             | <i>Heteromita globosa</i>                          | RG-Euk205 | SAMN01729678 |
| 0 | 0 | 0 | 5  | 1 | 0 | Cercozoa             | <i>Heteromita globosa</i>                          | RG-Euk206 | SAMN01729679 |
| 0 | 2 | 0 | 0  | 0 | 0 | Ochrophyta           | Botrydiopsidaceae sp. PAB 485                      | RG-Euk207 | SAMN01729680 |



|   |   |   |   |   |   |                      |                                         |           |              |
|---|---|---|---|---|---|----------------------|-----------------------------------------|-----------|--------------|
| 0 | 1 | 0 | 0 | 0 | 0 | Glaucophyta          | Cyanophora paradoxa                     | RG-Euk208 | SAMN01729681 |
| 0 | 1 | 0 | 0 | 1 | 0 | Cercozoa             | Heteromita sp. PRA-74                   | RG-Euk209 | SAMN01729682 |
| 0 | 1 | 0 | 0 | 0 | 0 | Fungi incertae sedis | Cochlonema euryblastum                  | RG-Euk210 | SAMN01729683 |
| 0 | 1 | 0 | 0 | 0 | 0 | Ascomycota           | Pyronema omphalodes                     | RG-Euk211 | SAMN01729684 |
| 0 | 1 | 0 | 0 | 2 | 0 | Chytridiomycota      | Chytridiales sp. AF017                  | RG-Euk212 | SAMN01729685 |
| 0 | 0 | 0 | 0 | 1 | 0 | Chytridiomycota      | Spizellomyces sp. NBRC 105423           | RG-Euk213 | SAMN01729686 |
| 0 | 0 | 0 | 0 | 1 | 0 | Chlorophyta          | Choricystis sp. TP-2009                 | RG-Euk214 | SAMN01729687 |
| 0 | 1 | 0 | 0 | 0 | 0 | Euglenozoa           | Neobodo designis isolate JC12           | RG-Euk215 | SAMN01729688 |
| 0 | 1 | 0 | 0 | 3 | 0 | Amoebozoa            | Nolandella sp. ATCC 50913               | RG-Euk216 | SAMN01729689 |
| 0 | 2 | 0 | 0 | 1 | 0 | Ascomycota           | Taphrina vestergrenii                   | RG-Euk217 | SAMN01729690 |
| 0 | 1 | 0 | 0 | 0 | 0 | Cercozoa             | Heteromita globosa                      | RG-Euk218 | SAMN01729691 |
| 0 | 1 | 0 | 0 | 0 | 0 | Amoebozoa            | Nolandella sp. ATCC 50913               | RG-Euk219 | SAMN01729692 |
| 0 | 1 | 0 | 0 | 0 | 0 | Chytridiomycota      | Hyaloraphidium curvatum                 | RG-Euk220 | SAMN01729693 |
| 0 | 0 | 0 | 0 | 1 | 0 | Cercozoa             | Bodomorpha sp. HFCC57                   | RG-Euk221 | SAMN01729694 |
| 0 | 0 | 0 | 0 | 0 | 7 | Cercozoa             | Heteromita globosa                      | RG-Euk222 | SAMN01729695 |
| 0 | 0 | 0 | 0 | 3 | 0 | Basidiomycota        | Itersonilia perplexans isolate AFTOL-ID | RG-Euk223 | SAMN01729696 |
| 0 | 0 | 0 | 0 | 1 | 0 | Rhizopoda            | Vampyrella pendula                      | RG-Euk224 | SAMN01729697 |
| 0 | 1 | 0 | 0 | 0 | 0 | Cercozoa             | Neocercomonas sp. strain 9-4.1          | RG-Euk225 | SAMN01729698 |
| 0 | 1 | 0 | 0 | 0 | 0 | Fungi incertae sedis | Basidiobolus ranarum strain NRRL 34594  | RG-Euk226 | SAMN01729699 |
| 0 | 0 | 0 | 0 | 1 | 0 | Heterokontophyta     | Pythiaceae sp. PHY2                     | RG-Euk227 | SAMN01729700 |
| 0 | 0 | 0 | 0 | 1 | 6 | Cercozoa             | Bodomorpha sp. HFCC57                   | RG-Euk228 | SAMN01729701 |
| 0 | 1 | 0 | 0 | 1 | 3 | Chlorophyta          | Chlorococcalean sp. 84/98               | RG-Euk229 | SAMN01729702 |
| 0 | 1 | 0 | 0 | 0 | 0 | Cercozoa             | Trinema lineare                         | RG-Euk230 | SAMN01729703 |
| 0 | 1 | 0 | 0 | 0 | 0 | Chytridiomycota      | Chytridiales sp. AF017                  | RG-Euk231 | SAMN01729704 |
| 0 | 1 | 0 | 0 | 0 | 0 | Ciliophora           | Oxytricha sp. Ox_L1                     | RG-Euk232 | SAMN01729705 |
| 0 | 0 | 0 | 0 | 1 | 0 | Chlorophyta          | Chloromonas nivalis                     | RG-Euk233 | SAMN01729706 |
| 0 | 0 | 0 | 0 | 1 | 0 | Blastocladiomycota   | Allomyces arbuscula                     | RG-Euk234 | SAMN01729707 |
| 0 | 1 | 0 | 0 | 0 | 0 | Cercozoa             | Capsellina sp. ATCC 50039               | RG-Euk235 | SAMN01729708 |
| 0 | 1 | 0 | 0 | 0 | 0 | Chytridiomycota      | Spizellomyces sp. NBRC 106283           | RG-Euk236 | SAMN01729709 |
| 0 | 0 | 0 | 0 | 1 | 6 | Cercozoa             | Heteromita globosa                      | RG-Euk237 | SAMN01729710 |
| 0 | 1 | 0 | 0 | 0 | 0 | Amoebozoa            | Platyamoeba sp. strain VV/I             | RG-Euk238 | SAMN01729711 |
| 0 | 1 | 0 | 0 | 0 | 0 | Cercozoa             | Bodomorpha sp. HFCC57                   | RG-Euk239 | SAMN01729712 |
| 0 | 1 | 0 | 0 | 0 | 0 | Ascomycota           | Taphrina vestergrenii                   | RG-Euk240 | SAMN01729713 |
| 0 | 1 | 0 | 0 | 0 | 0 | Amoebozoa            | Soliformovum expulsum                   | RG-Euk241 | SAMN01729714 |
| 0 | 1 | 0 | 0 | 0 | 0 | Cercozoa             | Bodomorpha sp. HFCC57                   | RG-Euk242 | SAMN01729715 |

|   |   |    |   |   |   |                    |                                                    |           |              |
|---|---|----|---|---|---|--------------------|----------------------------------------------------|-----------|--------------|
| 0 | 1 | 0  | 0 | 0 | 0 | Ascomycota         | <i>Taphrina vestergrenii</i>                       | RG-Euk243 | SAMN01729716 |
| 0 | 0 | 0  | 1 | 0 | 0 | Chlorophyta        | <i>Diplosphaera</i> sp. W1118                      | RG-Euk244 | SAMN01729717 |
| 0 | 1 | 0  | 0 | 0 | 0 | Chytridiomycota    | <i>Rhizidium endosporangiatum</i>                  | RG-Euk245 | SAMN01729718 |
| 0 | 0 | 0  | 0 | 0 | 1 | Cercozoa           | <i>Bodomorpha</i> sp. HFCC57                       | RG-Euk246 | SAMN01729719 |
| 0 | 1 | 0  | 0 | 0 | 0 | Ascomycota         | <i>Kloeckera lindneri</i>                          | RG-Euk247 | SAMN01729720 |
| 0 | 1 | 0  | 1 | 0 | 0 | Cercozoa           | <i>Capsellina</i> sp. ATCC 50039                   | RG-Euk248 | SAMN01729721 |
| 0 | 0 | 0  | 0 | 1 | 0 | Chlorophyta        | <i>Chlamydomodium</i> sp. ML0301CTb                | RG-Euk249 | SAMN01729722 |
| 0 | 1 | 0  | 0 | 2 | 0 | Cercozoa           | <i>Heteromita globosa</i>                          | RG-Euk250 | SAMN01729723 |
| 0 | 1 | 0  | 0 | 0 | 0 | Cercozoa           | <i>Capsellina</i> sp. ATCC 50039                   | RG-Euk251 | SAMN01729724 |
| 0 | 1 | 0  | 0 | 0 | 0 | Cercozoa           | <i>Cercomonas plasmodialis</i>                     | RG-Euk252 | SAMN01729725 |
| 0 | 1 | 0  | 0 | 0 | 0 | Cercozoa           | <i>Capsellina</i> sp. ATCC 50039                   | RG-Euk253 | SAMN01729726 |
| 0 | 1 | 0  | 0 | 0 | 0 | Cercozoa           | <i>Heteromita globosa</i>                          | RG-Euk254 | SAMN01729727 |
| 0 | 1 | 0  | 0 | 0 | 0 | Cercozoa           | <i>Neocercomonas</i> sp. strain 9-4.1              | RG-Euk255 | SAMN01729728 |
| 0 | 1 | 0  | 0 | 0 | 0 | Cercozoa           | <i>Cercomonas</i> sp. LargeSA                      | RG-Euk256 | SAMN01729729 |
| 0 | 1 | 0  | 0 | 0 | 0 | Chytridiomycota    | <i>Rhizophyidium elyensis</i> isolate AFTOL-ID 693 | RG-Euk257 | SAMN01729730 |
| 0 | 1 | 0  | 0 | 0 | 0 | Choanozoa          | <i>Sphaerothecum destruens</i>                     | RG-Euk258 | SAMN01729731 |
| 0 | 0 | 0  | 0 | 2 | 4 | Basidiomycota      | <i>Kriegeria eriophori</i> isolate AFTOL-ID 886    | RG-Euk259 | SAMN01729732 |
| 0 | 1 | 0  | 0 | 0 | 1 | Cercozoa           | <i>Bodomorpha</i> sp. HFCC57                       | RG-Euk260 | SAMN01729733 |
| 0 | 1 | 0  | 0 | 0 | 0 | Blastocladiomycota | <i>Allomyces arbuscula</i> strain Brazil 2         | RG-Euk261 | SAMN01729734 |
| 0 | 0 | 0  | 0 | 0 | 1 | Cercozoa           | <i>Bodomorpha</i> sp. HFCC56                       | RG-Euk262 | SAMN01729735 |
| 0 | 0 | 0  | 1 | 0 | 0 | Cercozoa           | <i>Capsellina</i> sp. ATCC 50039                   | RG-Euk263 | SAMN01729736 |
| 0 | 0 | 0  | 0 | 0 | 9 | Cercozoa           | <i>Bodomorpha</i> sp. HFCC57                       | RG-Euk264 | SAMN01729737 |
| 0 | 1 | 0  | 0 | 0 | 0 | Cercozoa           | <i>Bodomorpha</i> sp. HFCC56                       | RG-Euk265 | SAMN01729738 |
| 0 | 1 | 0  | 0 | 0 | 0 | Cercozoa           | <i>Bodomorpha</i> sp. HFCC57                       | RG-Euk266 | SAMN01729739 |
| 0 | 1 | 0  | 0 | 0 | 0 | Amoebozoa          | <i>Vannella</i> sp. COHH                           | RG-Euk267 | SAMN01729740 |
| 0 | 1 | 0  | 0 | 1 | 2 | Cercozoa           | <i>Bodomorpha</i> sp. HFCC57                       | RG-Euk268 | SAMN01729741 |
| 0 | 1 | 0  | 0 | 0 | 0 | Cercozoa           | <i>Bodomorpha</i> sp. HFCC57                       | RG-Euk269 | SAMN01729742 |
| 0 | 0 | 0  | 2 | 0 | 0 | Blastocladiomycota | <i>Allomyces arbuscula</i> strain Brazil 2         | RG-Euk270 | SAMN01729743 |
| 0 | 1 | 0  | 0 | 0 | 0 | Amoebozoa          | <i>Schizoplasmodiopsis vulgaris</i>                | RG-Euk271 | SAMN01729744 |
| 0 | 1 | 0  | 0 | 0 | 0 | Cercozoa           | <i>Protaspis grandis</i>                           | RG-Euk272 | SAMN01729745 |
| 0 | 1 | 0  | 0 | 0 | 0 | Cercozoa           | <i>Bodomorpha</i> sp. HFCC57                       | RG-Euk273 | SAMN01729746 |
| 0 | 0 | 15 | 0 | 0 | 0 | Ciliophora         | <i>Blepharisma japonicum</i>                       | RG-Euk274 | SAMN01729747 |
| 0 | 0 | 10 | 0 | 0 | 0 | Ciliophora         | <i>Dileptus costaricanus</i>                       | RG-Euk275 | SAMN01729748 |
| 0 | 0 | 4  | 0 | 0 | 0 | Ciliophora         | <i>Blepharisma japonicum</i>                       | RG-Euk276 | SAMN01729749 |
| 0 | 0 | 4  | 0 | 0 | 0 | Ciliophora         | <i>Tiarina fusa</i>                                | RG-Euk277 | SAMN01729750 |

|   |   |   |    |   |   |                       |                                            |           |              |
|---|---|---|----|---|---|-----------------------|--------------------------------------------|-----------|--------------|
| 0 | 0 | 3 | 0  | 0 | 0 | Ciliophora            | Bryometopus pseudochilodon                 | RG-Euk278 | SAMN01729751 |
| 0 | 0 | 1 | 0  | 0 | 0 | Ciliophora            | Stokesia vernalis                          | RG-Euk279 | SAMN01729752 |
| 0 | 0 | 1 | 0  | 0 | 0 | Basidiomycota         | Kriegeria eriophori isolate AFTOL-ID 886   | RG-Euk280 | SAMN01729753 |
| 0 | 0 | 1 | 0  | 0 | 0 | Ciliophora            | Blepharisma japonicum                      | RG-Euk281 | SAMN01729754 |
| 0 | 0 | 1 | 0  | 1 | 0 | Chlorophyta           | Chlorococcalean sp. 84/98                  | RG-Euk282 | SAMN01729755 |
| 0 | 0 | 1 | 0  | 0 | 0 | Chlorophyta           | Chlamydomonas reinhardtii strain SAG 53.72 | RG-Euk283 | SAMN01729756 |
| 0 | 0 | 1 | 0  | 0 | 0 | Ciliophora            | Frontonia didieri                          | RG-Euk284 | SAMN01729757 |
| 0 | 0 | 1 | 0  | 0 | 0 | Chlorophyta           | Chlorococcalean sp. 84/98                  | RG-Euk285 | SAMN01729758 |
| 0 | 0 | 1 | 0  | 0 | 0 | Ciliophora            | Stokesia vernalis                          | RG-Euk286 | SAMN01729759 |
| 0 | 0 | 1 | 0  | 0 | 0 | Amoebozoa             | Hartmannella cantabrigiensis               | RG-Euk287 | SAMN01729760 |
| 0 | 0 | 1 | 0  | 0 | 0 | Ciliophora            | Homalogastra setosa isolate GT1            | RG-Euk288 | SAMN01729761 |
| 0 | 0 | 1 | 0  | 0 | 0 | Ciliophora            | Acineta sp. OSW-2003-3                     | RG-Euk289 | SAMN01729762 |
| 0 | 0 | 0 | 58 | 1 | 0 | Neocallimastigomycota | Piromyces sp. PGL25                        | RG-Euk290 | SAMN01729763 |
| 0 | 0 | 0 | 9  | 0 | 0 | Rhizopoda             | Vampyrella pendula                         | RG-Euk291 | SAMN01729764 |
| 0 | 0 | 0 | 11 | 0 | 0 | Cercozoa              | Heteromita globosa                         | RG-Euk292 | SAMN01729765 |
| 0 | 0 | 0 | 4  | 0 | 0 | Cercozoa              | Heteromita globosa                         | RG-Euk293 | SAMN01729766 |
| 0 | 0 | 0 | 2  | 2 | 0 | Chlorophyta           | Chloromonas nivalis                        | RG-Euk294 | SAMN01729767 |
| 0 | 0 | 0 | 8  | 0 | 0 | Cercozoa              | Heteromita globosa                         | RG-Euk295 | SAMN01729768 |
| 0 | 0 | 0 | 1  | 1 | 0 | Cercozoa              | Protaspis grandis                          | RG-Euk296 | SAMN01729769 |
| 0 | 0 | 0 | 1  | 0 | 0 | Chlorophyta           | Neosporangiococcum gelatinosum             | RG-Euk297 | SAMN01729770 |
| 0 | 0 | 0 | 1  | 0 | 0 | Chlorophyta           | Pseudendoconiopsis botryoides              | RG-Euk298 | SAMN01729771 |
| 0 | 0 | 0 | 1  | 0 | 0 | Rhizopoda             | Vampyrella pendula                         | RG-Euk299 | SAMN01729772 |
| 0 | 0 | 0 | 1  | 0 | 0 | Basidiomycota         | Leucosporidium sp. AY30                    | RG-Euk300 | SAMN01729773 |
| 0 | 0 | 0 | 1  | 0 | 0 | Cercozoa              | Capsellina sp. ATCC 50039                  | RG-Euk301 | SAMN01729774 |
| 0 | 0 | 0 | 1  | 0 | 0 | Basidiomycota         | Leucosporidium sp. AY30                    | RG-Euk302 | SAMN01729775 |
| 0 | 0 | 0 | 1  | 1 | 0 | Cercozoa              | Capsellina sp. ATCC 50039                  | RG-Euk303 | SAMN01729776 |
| 0 | 0 | 0 | 1  | 0 | 0 | Chlorophyta           | Pseudendoconiopsis botryoides              | RG-Euk304 | SAMN01729777 |
| 0 | 0 | 0 | 1  | 0 | 0 | Chlorophyta           | Pseudendoconiopsis botryoides              | RG-Euk305 | SAMN01729778 |
| 0 | 0 | 0 | 4  | 0 | 0 | Cercozoa              | Heteromita globosa                         | RG-Euk306 | SAMN01729779 |
| 0 | 0 | 0 | 2  | 0 | 0 | Cercozoa              | Heteromita globosa                         | RG-Euk307 | SAMN01729780 |
| 0 | 0 | 0 | 1  | 0 | 0 | Cercozoa              | Capsellina sp. ATCC 50039                  | RG-Euk308 | SAMN01729781 |
| 0 | 0 | 0 | 1  | 0 | 0 | Cercozoa              | Heteromita globosa                         | RG-Euk309 | SAMN01729782 |
| 0 | 0 | 0 | 4  | 0 | 0 | Cercozoa              | Bodomorpha sp. HFCC56                      | RG-Euk310 | SAMN01729783 |
| 0 | 0 | 0 | 2  | 0 | 0 | Cercozoa              | Bodomorpha sp. HFCC56                      | RG-Euk311 | SAMN01729784 |
| 0 | 0 | 0 | 1  | 0 | 0 | Neocallimastigomycota | Piromyces sp. PGL25                        | RG-Euk312 | SAMN01729785 |

|   |   |   |   |   |   |                       |                                            |           |              |
|---|---|---|---|---|---|-----------------------|--------------------------------------------|-----------|--------------|
| 0 | 0 | 0 | 1 | 0 | 0 | Rhizopoda             | Vampyrella pendula                         | RG-Euk313 | SAMN01729786 |
| 0 | 0 | 0 | 2 | 0 | 0 | Rhizopoda             | Vampyrella pendula                         | RG-Euk314 | SAMN01729787 |
| 0 | 0 | 0 | 1 | 0 | 0 | Cercozoa              | Protaspis grandis                          | RG-Euk315 | SAMN01729788 |
| 0 | 0 | 0 | 1 | 0 | 0 | Ciliophora            | Amphisiella magnigranulosa                 | RG-Euk316 | SAMN01729789 |
| 0 | 0 | 0 | 1 | 0 | 0 | Cercozoa              | Heteromita globosa                         | RG-Euk317 | SAMN01729790 |
| 0 | 0 | 0 | 1 | 1 | 0 | Cercozoa              | Capsellina sp. ATCC 50039                  | RG-Euk318 | SAMN01729791 |
| 0 | 0 | 0 | 1 | 0 | 0 | Rhizopoda             | Vampyrella pendula                         | RG-Euk319 | SAMN01729792 |
| 0 | 0 | 0 | 1 | 0 | 0 | Ciliophora            | Amphisiella magnigranulosa                 | RG-Euk320 | SAMN01729793 |
| 0 | 0 | 0 | 1 | 0 | 0 | Blastocladiomycota    | Allomyces arbuscula strain Brazil 2        | RG-Euk321 | SAMN01729794 |
| 0 | 0 | 0 | 4 | 0 | 0 | Chrysophyta           | Hydrurus foetidus                          | RG-Euk322 | SAMN01729795 |
| 0 | 0 | 0 | 1 | 0 | 0 | Neocallimastigomycota | Piromyces sp. PGL01                        | RG-Euk323 | SAMN01729796 |
| 0 | 0 | 0 | 1 | 0 | 0 | Basidiomycota         | Kriegeria eriophori isolate AFTOL-ID 886   | RG-Euk324 | SAMN01729797 |
| 0 | 0 | 0 | 2 | 0 | 0 | Cercozoa              | Heteromita globosa                         | RG-Euk325 | SAMN01729798 |
| 0 | 0 | 0 | 1 | 0 | 0 | Chlorophyta           | Neosporangiococcum gelatinosum             | RG-Euk326 | SAMN01729799 |
| 0 | 0 | 0 | 1 | 0 | 0 | Neocallimastigomycota | Piromyces sp. PGL25                        | RG-Euk327 | SAMN01729800 |
| 0 | 0 | 0 | 1 | 0 | 0 | Chlorophyta           | Diplosphaera sp. W1118                     | RG-Euk328 | SAMN01729801 |
| 0 | 0 | 0 | 1 | 0 | 0 | Cercozoa              | Heteromita globosa                         | RG-Euk329 | SAMN01729802 |
| 0 | 0 | 0 | 2 | 0 | 0 | Chlorophyta           | Cf. Chlorococcum sp. 105-99                | RG-Euk330 | SAMN01729803 |
| 0 | 0 | 0 | 1 | 0 | 0 | Chlorophyta           | Pseudendocloniopsis botryoides             | RG-Euk331 | SAMN01729804 |
| 0 | 0 | 0 | 1 | 1 | 0 | Cercozoa              | Heteromita globosa                         | RG-Euk332 | SAMN01729805 |
| 0 | 0 | 0 | 1 | 0 | 0 | Rhizopoda             | Vampyrella pendula                         | RG-Euk333 | SAMN01729806 |
| 0 | 0 | 0 | 1 | 0 | 0 | Rhizopoda             | Vampyrella pendula                         | RG-Euk334 | SAMN01729807 |
| 0 | 0 | 0 | 1 | 0 | 0 | Cercozoa              | Heteromita globosa                         | RG-Euk335 | SAMN01729808 |
| 0 | 0 | 0 | 1 | 0 | 0 | Cercozoa              | Capsellina sp. ATCC 50039                  | RG-Euk336 | SAMN01729809 |
| 0 | 0 | 0 | 1 | 0 | 0 | Cercozoa              | Capsellina sp. ATCC 50039                  | RG-Euk337 | SAMN01729810 |
| 0 | 0 | 0 | 1 | 0 | 0 | Cercozoa              | Capsellina sp. ATCC 50039                  | RG-Euk338 | SAMN01729811 |
| 0 | 0 | 0 | 1 | 0 | 0 | Neocallimastigomycota | Piromyces sp. PGL25                        | RG-Euk339 | SAMN01729812 |
| 0 | 0 | 0 | 0 | 2 | 2 | Cercozoa              | Bodomorpha sp. HFCC57                      | RG-Euk340 | SAMN01729813 |
| 0 | 0 | 0 | 0 | 1 | 0 | Basidiomycota         | Sporisorium formosanum AFTOL-ID 489        | RG-Euk341 | SAMN01729814 |
| 0 | 0 | 0 | 0 | 1 | 0 | Rhizopoda             | Vampyrella pendula                         | RG-Euk342 | SAMN01729815 |
| 0 | 0 | 0 | 0 | 0 | 2 | Cercozoa              | Heteromita globosa                         | RG-Euk343 | SAMN01729816 |
| 0 | 0 | 0 | 0 | 2 | 0 | Chytridiomycota       | Rhizophydium elyensis isolate AFTOL-ID 693 | RG-Euk344 | SAMN01729817 |
| 0 | 0 | 0 | 0 | 2 | 0 | Streptophyta          | Bryum donianum                             | RG-Euk345 | SAMN01729818 |
| 0 | 0 | 0 | 0 | 1 | 0 | Cercozoa              | Capsellina sp. ATCC 50039                  | RG-Euk346 | SAMN01729819 |
| 0 | 0 | 0 | 0 | 1 | 0 | Chlorophyta           | Pseudendocloniopsis botryoides             | RG-Euk347 | SAMN01729820 |

|   |   |   |   |   |   |                 |                                                   |           |              |
|---|---|---|---|---|---|-----------------|---------------------------------------------------|-----------|--------------|
| 0 | 0 | 0 | 0 | 2 | 0 | Chlorophyta     | <i>Pseudendocloniopsis botryoides</i>             | RG-Euk348 | SAMN01729821 |
| 0 | 0 | 0 | 0 | 2 | 0 | Basidiomycota   | <i>Leucosporidium</i> sp. AY30                    | RG-Euk349 | SAMN01729822 |
| 0 | 0 | 0 | 0 | 1 | 0 | Basidiomycota   | <i>Kriegeria eriophori</i> isolate AFTOL-ID 886   | RG-Euk350 | SAMN01729823 |
| 0 | 0 | 0 | 0 | 2 | 0 | Chlorophyta     | <i>Lobochlamys segnis</i>                         | RG-Euk351 | SAMN01729824 |
| 0 | 0 | 0 | 0 | 1 | 3 | Cercozoa        | <i>Bodomorpha</i> sp. HFCC56                      | RG-Euk352 | SAMN01729825 |
| 0 | 0 | 0 | 0 | 1 | 0 | Cercozoa        | <i>Bodomorpha</i> sp. HFCC57                      | RG-Euk353 | SAMN01729826 |
| 0 | 0 | 0 | 0 | 1 | 0 | Basidiomycota   | <i>Laurilia sulcata</i>                           | RG-Euk354 | SAMN01729827 |
| 0 | 0 | 0 | 0 | 2 | 0 | Chlorophyta     | <i>Ettlia carotinsa</i> strain SAG 213-4          | RG-Euk355 | SAMN01729828 |
| 0 | 0 | 0 | 0 | 1 | 0 | Basidiomycota   | <i>Leucosporidium</i> sp. AY30                    | RG-Euk356 | SAMN01729829 |
| 0 | 0 | 0 | 0 | 1 | 0 | Cercozoa        | <i>Protaspis grandis</i>                          | RG-Euk357 | SAMN01729830 |
| 0 | 0 | 0 | 0 | 1 | 0 | Chlorophyta     | <i>Cf. Pleurastrum</i> sp. CCCryo 340b-08         | RG-Euk358 | SAMN01729831 |
| 0 | 0 | 0 | 0 | 1 | 0 | Chlorophyta     | <i>Chloromonas nivalis</i>                        | RG-Euk359 | SAMN01729832 |
| 0 | 0 | 0 | 0 | 1 | 0 | Cercozoa        | <i>Neocercomonas</i> sp. strain 9-4.1             | RG-Euk360 | SAMN01729833 |
| 0 | 0 | 0 | 0 | 1 | 0 | Glaucophyta     | <i>Cyanophora paradoxa</i>                        | RG-Euk361 | SAMN01729834 |
| 0 | 0 | 0 | 0 | 1 | 0 | Cercozoa        | <i>Heteromita globosa</i>                         | RG-Euk362 | SAMN01729835 |
| 0 | 0 | 0 | 0 | 1 | 0 | Chlorophyta     | <i>Chloromonas nivalis</i>                        | RG-Euk363 | SAMN01729836 |
| 0 | 0 | 0 | 0 | 1 | 0 | Cercozoa        | <i>Bodomorpha</i> sp. HFCC57                      | RG-Euk364 | SAMN01729837 |
| 0 | 0 | 0 | 0 | 1 | 0 | Cercozoa        | <i>Thaumatomonas seravini</i>                     | RG-Euk365 | SAMN01729838 |
| 0 | 0 | 0 | 0 | 1 | 0 | Chlorophyta     | <i>Diplosphaera</i> sp. W1118                     | RG-Euk366 | SAMN01729839 |
| 0 | 0 | 0 | 0 | 1 | 0 | Chlorophyta     | <i>Scenedesmus obliquus</i>                       | RG-Euk367 | SAMN01729840 |
| 0 | 0 | 0 | 0 | 1 | 0 | Cercozoa        | <i>Protaspis grandis</i>                          | RG-Euk368 | SAMN01729841 |
| 0 | 0 | 0 | 0 | 1 | 0 | Cercozoa        | <i>Heteromita globosa</i>                         | RG-Euk369 | SAMN01729842 |
| 0 | 0 | 0 | 0 | 1 | 0 | Cercozoa        | <i>Bodomorpha</i> sp. HFCC56                      | RG-Euk370 | SAMN01729843 |
| 0 | 0 | 0 | 0 | 2 | 0 | Cercozoa        | <i>Bodomorpha</i> sp. HFCC57                      | RG-Euk371 | SAMN01729844 |
| 0 | 0 | 0 | 0 | 1 | 0 | Basidiomycota   | <i>Walleimia sebi</i> strain EXF-757              | RG-Euk372 | SAMN01729845 |
| 0 | 0 | 0 | 0 | 1 | 0 | Cercozoa        | <i>Bodomorpha</i> sp. HFCC56                      | RG-Euk373 | SAMN01729846 |
| 0 | 0 | 0 | 0 | 0 | 6 | Cercozoa        | <i>Bodomorpha</i> sp. HFCC57                      | RG-Euk374 | SAMN01729847 |
| 0 | 0 | 0 | 0 | 1 | 0 | Chlorophyta     | <i>Pseudendocloniopsis botryoides</i>             | RG-Euk375 | SAMN01729848 |
| 0 | 0 | 0 | 0 | 1 | 0 | Glomeromycota   | <i>Ambispora fennica</i>                          | RG-Euk376 | SAMN01729849 |
| 0 | 0 | 0 | 0 | 1 | 4 | Cercozoa        | <i>Bodomorpha</i> sp. HFCC57                      | RG-Euk377 | SAMN01729850 |
| 0 | 0 | 0 | 0 | 1 | 0 | Cercozoa        | <i>Heteromita globosa</i>                         | RG-Euk378 | SAMN01729851 |
| 0 | 0 | 0 | 0 | 1 | 0 | Cercozoa        | <i>Capsellina</i> sp. ATCC 50039                  | RG-Euk379 | SAMN01729852 |
| 0 | 0 | 0 | 0 | 1 | 0 | Chytridiomycota | <i>Rhizophydium elyensis</i> isolate AFTOL-ID 693 | RG-Euk380 | SAMN01729853 |
| 0 | 0 | 0 | 0 | 1 | 0 | Cercozoa        | <i>Heteromita globosa</i>                         | RG-Euk381 | SAMN01729854 |
| 0 | 0 | 0 | 0 | 1 | 0 | Cercozoa        | <i>Protaspis grandis</i>                          | RG-Euk382 | SAMN01729855 |

|   |   |   |   |   |   |                       |                                            |           |              |
|---|---|---|---|---|---|-----------------------|--------------------------------------------|-----------|--------------|
| 0 | 0 | 0 | 0 | 1 | 0 | Rhizopoda             | Vampyrella pendula                         | RG-Euk383 | SAMN01729856 |
| 0 | 0 | 0 | 0 | 1 | 0 | Cercozoa              | Capsellina sp. ATCC 50039                  | RG-Euk384 | SAMN01729857 |
| 0 | 0 | 0 | 0 | 1 | 0 | Chytridiomycota       | Lobulomyces angularis                      | RG-Euk385 | SAMN01729858 |
| 0 | 0 | 0 | 0 | 1 | 0 | Chytridiomycota       | Rhizidium endosporangiatum isolate AFTOL-I | RG-Euk386 | SAMN01729859 |
| 0 | 0 | 0 | 0 | 1 | 0 | Cercozoa              | Capsellina sp. ATCC 50039                  | RG-Euk387 | SAMN01729860 |
| 0 | 0 | 0 | 0 | 1 | 0 | Cercozoa              | Capsellina sp. ATCC 50039                  | RG-Euk388 | SAMN01729861 |
| 0 | 0 | 0 | 0 | 1 | 0 | Cercozoa              | Capsellina sp. ATCC 50039                  | RG-Euk389 | SAMN01729862 |
| 0 | 0 | 0 | 0 | 1 | 0 | Chytridiomycota       | Rhizidium endosporangiatum isolate AFTOL-I | RG-Euk390 | SAMN01729863 |
| 0 | 0 | 0 | 0 | 1 | 0 | Chlorophyta           | Brachiomonas sp. MBIC10757                 | RG-Euk391 | SAMN01729864 |
| 0 | 0 | 0 | 0 | 0 | 1 | Cercozoa              | Bodomorpha sp. HFCC57                      | RG-Euk392 | SAMN01729865 |
| 0 | 0 | 0 | 0 | 1 | 0 | Cercozoa              | Capsellina sp. ATCC 50039                  | RG-Euk393 | SAMN01729866 |
| 0 | 0 | 0 | 0 | 1 | 0 | Cercozoa              | Protaspis grandis                          | RG-Euk394 | SAMN01729867 |
| 0 | 0 | 0 | 0 | 1 | 0 | Neocallimastigomycota | Piromyces sp. PGL25                        | RG-Euk395 | SAMN01729868 |
| 0 | 0 | 0 | 0 | 1 | 0 | Chytridiomycota       | Chytridiales sp. AF021                     | RG-Euk396 | SAMN01729869 |
| 0 | 0 | 0 | 0 | 1 | 0 | Cercozoa              | Heteromita globosa                         | RG-Euk397 | SAMN01729870 |
| 0 | 0 | 0 | 0 | 1 | 0 | Chlorophyta           | Cf. Pleurastrum sp. CCCryo 340b-08         | RG-Euk398 | SAMN01729871 |
| 0 | 0 | 0 | 0 | 1 | 0 | Cercozoa              | Heteromita globosa                         | RG-Euk399 | SAMN01729872 |
| 0 | 0 | 0 | 0 | 1 | 0 | Basidiomycota         | Sporobolomyces tsugae                      | RG-Euk400 | SAMN01729873 |
| 0 | 0 | 0 | 0 | 1 | 0 | Chytridiomycota       | Lobulomyces angularis                      | RG-Euk401 | SAMN01729874 |
| 0 | 0 | 0 | 0 | 1 | 0 | Cercozoa              | Capsellina sp. ATCC 50039                  | RG-Euk402 | SAMN01729875 |
| 0 | 0 | 0 | 0 | 1 | 0 | Cercozoa              | Capsellina sp. ATCC 50039                  | RG-Euk403 | SAMN01729876 |
| 0 | 0 | 0 | 0 | 1 | 0 | Cercozoa              | Heteromita globosa                         | RG-Euk404 | SAMN01729877 |
| 0 | 0 | 0 | 0 | 1 | 0 | Chlorophyta           | Tetracystis tetraspora                     | RG-Euk405 | SAMN01729878 |
| 0 | 0 | 0 | 0 | 1 | 0 | Cercozoa              | Protaspis grandis                          | RG-Euk406 | SAMN01729879 |
| 0 | 0 | 0 | 0 | 1 | 0 | Ciliophora            | Amphisiella magnigranulosa                 | RG-Euk407 | SAMN01729880 |
| 0 | 0 | 0 | 0 | 1 | 0 | Chlorophyta           | Neosporangiococcum gelatinosum             | RG-Euk408 | SAMN01729881 |
| 0 | 0 | 0 | 0 | 1 | 0 | Chlorophyta           | Cf. Pleurastrum sp. CCCryo 340b-08         | RG-Euk409 | SAMN01729882 |
| 0 | 0 | 0 | 0 | 1 | 0 | Cercozoa              | Protaspis grandis                          | RG-Euk410 | SAMN01729883 |
| 0 | 0 | 0 | 0 | 1 | 0 | Chlorophyta           | Chloromonas nivalis                        | RG-Euk411 | SAMN01729884 |
| 0 | 0 | 0 | 0 | 1 | 0 | Basidiomycota         | Kriegeria eriophori isolate AFTOL-ID 886   | RG-Euk412 | SAMN01729885 |
| 0 | 0 | 0 | 0 | 1 | 0 | Cercozoa              | Heteromita globosa                         | RG-Euk413 | SAMN01729886 |
| 0 | 0 | 0 | 0 | 1 | 0 | Chlorophyta           | Chloromonas nivalis                        | RG-Euk414 | SAMN01729887 |
| 0 | 0 | 0 | 0 | 1 | 0 | Cercozoa              | Protaspis grandis                          | RG-Euk415 | SAMN01729888 |
| 0 | 0 | 0 | 0 | 1 | 0 | Cercozoa              | Protaspis grandis                          | RG-Euk416 | SAMN01729889 |
| 0 | 0 | 0 | 0 | 1 | 0 | Cercozoa              | Bodomorpha sp. HFCC57                      | RG-Euk417 | SAMN01729890 |

|   |   |   |   |   |   |                  |                                            |           |              |
|---|---|---|---|---|---|------------------|--------------------------------------------|-----------|--------------|
| 0 | 0 | 0 | 0 | 1 | 0 | Cercozoa         | Protaspis grandis                          | RG-Euk418 | SAMN01729891 |
| 0 | 0 | 0 | 0 | 2 | 0 | Cercozoa         | Capsellina sp. ATCC 50039                  | RG-Euk419 | SAMN01729892 |
| 0 | 0 | 0 | 0 | 1 | 0 | Choanozoa        | Sphaerothecum destruens                    | RG-Euk420 | SAMN01729893 |
| 0 | 0 | 0 | 0 | 1 | 0 | Heterokontophyta | Diplophrys marina                          | RG-Euk421 | SAMN01729894 |
| 0 | 0 | 0 | 0 | 1 | 0 | Cercozoa         | Heteromita globosa                         | RG-Euk422 | SAMN01729895 |
| 0 | 0 | 0 | 0 | 1 | 0 | Cercozoa         | Bodomorpha sp. HFCC56                      | RG-Euk423 | SAMN01729896 |
| 0 | 0 | 0 | 0 | 1 | 0 | Choanozoa        | Sphaerothecum destruens                    | RG-Euk424 | SAMN01729897 |
| 0 | 0 | 0 | 0 | 1 | 0 | Chlorophyta      | Micractinium sp. CCAP 248/2                | RG-Euk425 | SAMN01729898 |
| 0 | 0 | 0 | 0 | 1 | 0 | Glaucophyta      | Glaucozystis nostochinearum                | RG-Euk426 | SAMN01729899 |
| 0 | 0 | 0 | 0 | 1 | 0 | Cercozoa         | Protaspis grandis                          | RG-Euk427 | SAMN01729900 |
| 0 | 0 | 0 | 0 | 1 | 0 | Cercozoa         | Protaspis grandis                          | RG-Euk428 | SAMN01729901 |
| 0 | 0 | 0 | 0 | 1 | 0 | Cercozoa         | Bodomorpha sp. HFCC57                      | RG-Euk429 | SAMN01729902 |
| 0 | 0 | 0 | 0 | 1 | 0 | Chytridiomycota  | Spizellomyces sp. NBRC 106283              | RG-Euk430 | SAMN01729903 |
| 0 | 0 | 0 | 0 | 2 | 0 | Cercozoa         | Heteromita globosa                         | RG-Euk431 | SAMN01729904 |
| 0 | 0 | 0 | 0 | 1 | 0 | Porifera         | Hymeniacidon sinapium                      | RG-Euk432 | SAMN01729905 |
| 0 | 0 | 0 | 0 | 1 | 0 | Chytridiomycota  | Rhizophydium elyensis isolate AFTOL-ID 693 | RG-Euk433 | SAMN01729906 |
| 0 | 0 | 0 | 0 | 1 | 0 | Chytridiomycota  | Rhizophydium elyensis isolate AFTOL-ID 693 | RG-Euk434 | SAMN01729907 |
| 0 | 0 | 0 | 0 | 1 | 0 | Cercozoa         | Protaspis grandis                          | RG-Euk435 | SAMN01729908 |
| 0 | 0 | 0 | 0 | 2 | 0 | Cercozoa         | Capsellina sp. ATCC 50039                  | RG-Euk436 | SAMN01729909 |
| 0 | 0 | 0 | 0 | 1 | 0 | Chytridiomycota  | Oedogoniomyces sp. CR84 isolate AFTOL-ID   | RG-Euk437 | SAMN01729910 |
| 0 | 0 | 0 | 0 | 1 | 0 | Cercozoa         | Capsellina sp. ATCC 50039                  | RG-Euk438 | SAMN01729911 |
| 0 | 0 | 0 | 0 | 1 | 0 | Chytridiomycota  | Chytridiales sp. AF017                     | RG-Euk439 | SAMN01729912 |
| 0 | 0 | 0 | 0 | 1 | 0 | Cercozoa         | Capsellina sp. ATCC 50039                  | RG-Euk440 | SAMN01729913 |
| 0 | 0 | 0 | 0 | 1 | 0 | Glomeromycota    | Scutellospora calospora                    | RG-Euk441 | SAMN01729914 |
| 0 | 0 | 0 | 0 | 0 | 1 | Basidiomycota    | Kriegeria eriophori isolate AFTOL-ID 886   | RG-Euk442 | SAMN01729915 |
| 0 | 0 | 0 | 0 | 1 | 0 | Chlorophyta      | Choricystis sp. AS-29                      | RG-Euk443 | SAMN01729916 |
| 0 | 0 | 0 | 0 | 1 | 0 | Chlorophyta      | Neospongiococcum gelatinosum               | RG-Euk444 | SAMN01729917 |
| 0 | 0 | 0 | 0 | 1 | 0 | Basidiomycota    | Corioliopsis gallica strain RLG 7630-SP    | RG-Euk445 | SAMN01729918 |
| 0 | 0 | 0 | 0 | 0 | 1 | Cercozoa         | Bodomorpha sp. HFCC57                      | RG-Euk446 | SAMN01729919 |
| 0 | 0 | 0 | 0 | 1 | 0 | Cercozoa         | Capsellina sp. ATCC 50039                  | RG-Euk447 | SAMN01729920 |
| 0 | 0 | 0 | 0 | 1 | 0 | Chlorophyta      | Micractinium sp. CCAP 248/2                | RG-Euk448 | SAMN01729921 |
| 0 | 0 | 0 | 0 | 1 | 0 | Basidiomycota    | Hymenogastraceae sp. PBM3420               | RG-Euk449 | SAMN01729922 |
| 0 | 0 | 0 | 0 | 1 | 0 | Ascomycota       | Bulgaria inquinans isolate 93              | RG-Euk450 | SAMN01729923 |
| 0 | 0 | 0 | 0 | 1 | 0 | Cercozoa         | Capsellina sp. ATCC 50039                  | RG-Euk451 | SAMN01729924 |
| 0 | 0 | 0 | 0 | 1 | 0 | Cercozoa         | Capsellina sp. ATCC 50039                  | RG-Euk452 | SAMN01729925 |

|   |   |   |   |   |   |                       |                                     |           |              |
|---|---|---|---|---|---|-----------------------|-------------------------------------|-----------|--------------|
| 0 | 0 | 0 | 0 | 1 | 0 | Rhizopoda             | Vampyrella pendula                  | RG-Euk453 | SAMN01729926 |
| 0 | 0 | 0 | 0 | 1 | 0 | Amoebozoa             | Schizoplasmodiopsis vulgaris        | RG-Euk454 | SAMN01729927 |
| 0 | 0 | 0 | 0 | 1 | 0 | Ascomycota            | Pyronema omphalodes                 | RG-Euk455 | SAMN01729928 |
| 0 | 0 | 0 | 0 | 1 | 0 | Neocallimastigomycota | Piromyces sp. PGL25                 | RG-Euk456 | SAMN01729929 |
| 0 | 0 | 0 | 0 | 1 | 0 | Cercozoa              | Protaspis grandis                   | RG-Euk457 | SAMN01729930 |
| 0 | 0 | 0 | 0 | 1 | 0 | Cercozoa              | Bodomorpha sp. HFCC57               | RG-Euk458 | SAMN01729931 |
| 0 | 0 | 0 | 0 | 1 | 0 | Chlorophyta           | Micractinium sp. TP-2008b           | RG-Euk459 | SAMN01729932 |
| 0 | 0 | 0 | 0 | 1 | 0 | Chytridiomycota       | Chytridiales sp. AF017              | RG-Euk460 | SAMN01729933 |
| 0 | 0 | 0 | 0 | 1 | 0 | Heterokontophyta      | Diplophrys marina                   | RG-Euk461 | SAMN01729934 |
| 0 | 0 | 0 | 0 | 1 | 0 | Heterokontophyta      | Diplophrys marina                   | RG-Euk462 | SAMN01729935 |
| 0 | 0 | 0 | 0 | 1 | 0 | Cercozoa              | Protaspis grandis                   | RG-Euk463 | SAMN01729936 |
| 0 | 0 | 0 | 0 | 1 | 0 | Cercozoa              | Neocercomonas sp. strain 9-4.1      | RG-Euk464 | SAMN01729937 |
| 0 | 0 | 0 | 0 | 1 | 0 | Cercozoa              | Protaspis grandis                   | RG-Euk465 | SAMN01729938 |
| 0 | 0 | 0 | 0 | 1 | 0 | Cercozoa              | Protaspis grandis                   | RG-Euk466 | SAMN01729939 |
| 0 | 0 | 0 | 0 | 1 | 0 | Cercozoa              | Capsellina sp. ATCC 50039           | RG-Euk467 | SAMN01729940 |
| 0 | 0 | 0 | 0 | 1 | 0 | Chytridiomycota       | Spizellomyces sp. NBRC 106283       | RG-Euk468 | SAMN01729941 |
| 0 | 0 | 0 | 0 | 1 | 0 | Cercozoa              | Heteromita globosa                  | RG-Euk469 | SAMN01729942 |
| 0 | 0 | 0 | 0 | 1 | 0 | Chlorophyta           | Chloromonas nivalis                 | RG-Euk470 | SAMN01729943 |
| 0 | 0 | 0 | 0 | 1 | 0 | Cercozoa              | Bodomorpha sp. HFCC57               | RG-Euk471 | SAMN01729944 |
| 0 | 0 | 0 | 0 | 1 | 0 | Cercozoa              | Protaspis grandis                   | RG-Euk472 | SAMN01729945 |
| 0 | 0 | 0 | 0 | 1 | 0 | Blastocladiomycota    | Allomyces arbuscula strain Brazil 2 | RG-Euk473 | SAMN01729946 |
| 0 | 0 | 0 | 0 | 2 | 0 | Cercozoa              | Capsellina sp. ATCC 50039           | RG-Euk474 | SAMN01729947 |
| 0 | 0 | 0 | 0 | 1 | 0 | Cercozoa              | Bodomorpha sp. HFCC56               | RG-Euk475 | SAMN01729948 |
| 0 | 0 | 0 | 0 | 1 | 0 | Chlorophyta           | Pseudendoconionopsis botryoides     | RG-Euk476 | SAMN01729949 |
| 0 | 0 | 0 | 0 | 1 | 0 | Cercozoa              | Capsellina sp. ATCC 50039           | RG-Euk477 | SAMN01729950 |
| 0 | 0 | 0 | 0 | 1 | 0 | Cercozoa              | Capsellina sp. ATCC 50039           | RG-Euk478 | SAMN01729951 |
| 0 | 0 | 0 | 0 | 1 | 0 | Cercozoa              | Protaspis grandis                   | RG-Euk479 | SAMN01729952 |
| 0 | 0 | 0 | 0 | 1 | 0 | Cercozoa              | Neocercomonas sp. strain 9-4.1      | RG-Euk480 | SAMN01729953 |
| 0 | 0 | 0 | 0 | 1 | 0 | Chlorophyta           | Neosporangiococcum gelatinosum      | RG-Euk481 | SAMN01729954 |
| 0 | 0 | 0 | 0 | 1 | 0 | Cercozoa              | Heteromita globosa                  | RG-Euk482 | SAMN01729955 |
| 0 | 0 | 0 | 0 | 1 | 0 | Cercozoa              | Capsellina sp. ATCC 50039           | RG-Euk483 | SAMN01729956 |
| 0 | 0 | 0 | 0 | 1 | 0 | Cercozoa              | Protaspis grandis                   | RG-Euk484 | SAMN01729957 |
| 0 | 0 | 0 | 0 | 1 | 0 | Cercozoa              | Capsellina sp. ATCC 50039           | RG-Euk485 | SAMN01729958 |
| 0 | 0 | 0 | 0 | 1 | 0 | Blastocladiomycota    | Microallomyces sp. CR74             | RG-Euk486 | SAMN01729959 |
| 0 | 0 | 0 | 0 | 1 | 0 | Ascomycota            | Sarcinomyces sp. MA 4760            | RG-Euk487 | SAMN01729960 |



|   |   |   |   |   |   |               |                                              |           |              |
|---|---|---|---|---|---|---------------|----------------------------------------------|-----------|--------------|
| 0 | 0 | 0 | 0 | 1 | 0 | Cercozoa      | Neocercomonas sp. strain 9-4.1               | RG-Euk488 | SAMN01729961 |
| 0 | 0 | 0 | 0 | 1 | 0 | Chlorophyta   | Pseudendocloniopsis botryoides               | RG-Euk489 | SAMN01729962 |
| 0 | 0 | 0 | 0 | 1 | 0 | Cercozoa      | Capsellina sp. ATCC 50039                    | RG-Euk490 | SAMN01729963 |
| 0 | 0 | 0 | 0 | 1 | 0 | Cercozoa      | Bodomorpha sp. HFCC56                        | RG-Euk491 | SAMN01729964 |
| 0 | 0 | 0 | 0 | 1 | 0 | Basidiomycota | Wallemia sebi strain EXF-757                 | RG-Euk492 | SAMN01729965 |
| 0 | 0 | 0 | 0 | 0 | 7 | Cercozoa      | Bodomorpha sp. HFCC57                        | RG-Euk493 | SAMN01729966 |
| 0 | 0 | 0 | 0 | 0 | 3 | Cercozoa      | Heteromita globosa                           | RG-Euk494 | SAMN01729967 |
| 0 | 0 | 0 | 0 | 0 | 1 | Cercozoa      | Bodomorpha sp. HFCC57                        | RG-Euk495 | SAMN01729968 |
| 0 | 0 | 0 | 0 | 0 | 2 | Arthropoda    | Pemphigus betae                              | RG-Euk496 | SAMN01729969 |
| 0 | 0 | 0 | 0 | 0 | 4 | Cercozoa      | Bodomorpha sp. HFCC56                        | RG-Euk497 | SAMN01729970 |
| 0 | 0 | 0 | 0 | 0 | 3 | Cercozoa      | Bodomorpha sp. HFCC57                        | RG-Euk498 | SAMN01729971 |
| 0 | 0 | 0 | 0 | 0 | 1 | Cercozoa      | Bodomorpha sp. HFCC57                        | RG-Euk499 | SAMN01729972 |
| 0 | 0 | 0 | 0 | 0 | 3 | Cercozoa      | Bodomorpha sp. HFCC57                        | RG-Euk500 | SAMN01729973 |
| 0 | 0 | 0 | 0 | 0 | 1 | Cercozoa      | Bodomorpha sp. HFCC57                        | RG-Euk501 | SAMN01729974 |
| 0 | 0 | 0 | 0 | 0 | 2 | Basidiomycota | Kriegeria eriophori isolate AFTOL-ID 886     | RG-Euk502 | SAMN01729975 |
| 0 | 0 | 0 | 0 | 0 | 1 | Basidiomycota | Sporobolomyces falcatus                      | RG-Euk503 | SAMN01729976 |
| 0 | 0 | 0 | 0 | 0 | 1 | Cercozoa      | Bodomorpha sp. HFCC57                        | RG-Euk504 | SAMN01729977 |
| 0 | 0 | 0 | 0 | 0 | 1 | Basidiomycota | Kriegeria eriophori isolate AFTOL-ID 886     | RG-Euk505 | SAMN01729978 |
| 0 | 0 | 0 | 0 | 0 | 1 | Cercozoa      | Bodomorpha sp. HFCC56                        | RG-Euk506 | SAMN01729979 |
| 0 | 0 | 0 | 0 | 0 | 1 | Cercozoa      | Bodomorpha sp. HFCC56                        | RG-Euk507 | SAMN01729980 |
| 0 | 0 | 0 | 0 | 0 | 1 | Chlorophyta   | Chlorococcalean sp. 84/98                    | RG-Euk508 | SAMN01729981 |
| 0 | 0 | 0 | 0 | 0 | 2 | Cercozoa      | Bodomorpha sp. HFCC57                        | RG-Euk509 | SAMN01729982 |
| 0 | 0 | 0 | 0 | 0 | 1 | Cercozoa      | Bodomorpha sp. HFCC57                        | RG-Euk510 | SAMN01729983 |
| 0 | 0 | 0 | 0 | 0 | 1 | Ascomycota    | Phialocephala repens                         | RG-Euk511 | SAMN01729984 |
| 0 | 0 | 0 | 0 | 0 | 2 | Basidiomycota | Mastigobasidium intermedium                  | RG-Euk512 | SAMN01729985 |
| 0 | 0 | 0 | 0 | 0 | 1 | Chlorophyta   | Chlorococcalean sp. 84/98                    | RG-Euk513 | SAMN01729986 |
| 0 | 0 | 0 | 0 | 0 | 1 | Cercozoa      | Bodomorpha sp. HFCC57                        | RG-Euk514 | SAMN01729987 |
| 0 | 0 | 0 | 0 | 0 | 1 | Cercozoa      | Bodomorpha sp. HFCC57                        | RG-Euk515 | SAMN01729988 |
| 0 | 0 | 0 | 0 | 0 | 2 | Ascomycota    | Glyphium elatum                              | RG-Euk516 | SAMN01729989 |
| 0 | 0 | 0 | 0 | 0 | 1 | Cercozoa      | Bodomorpha sp. HFCC56                        | RG-Euk517 | SAMN01729990 |
| 0 | 0 | 0 | 0 | 0 | 1 | Chlorophyta   | Chlorococcalean sp. 84/98                    | RG-Euk518 | SAMN01729991 |
| 0 | 0 | 0 | 0 | 0 | 1 | Cercozoa      | Bodomorpha sp. HFCC56                        | RG-Euk519 | SAMN01729992 |
| 0 | 0 | 0 | 0 | 0 | 1 | Basidiomycota | Sporobolomyces falcatus                      | RG-Euk520 | SAMN01729993 |
| 0 | 0 | 0 | 0 | 0 | 1 | Cercozoa      | Heteromita globosa                           | RG-Euk521 | SAMN01729994 |
| 0 | 0 | 0 | 0 | 0 | 1 | Ascomycota    | Delphinella strobiligena isolate AFTOL-ID 12 | RG-Euk522 | SAMN01729995 |

|   |   |   |   |   |   |               |                                            |           |              |
|---|---|---|---|---|---|---------------|--------------------------------------------|-----------|--------------|
| 0 | 0 | 0 | 0 | 0 | 1 | Cercozoa      | Bodomorpha sp. HFCC56                      | RG-Euk523 | SAMN01729996 |
| 0 | 0 | 0 | 0 | 0 | 1 | Chlorophyta   | Chloromonas nivalis                        | RG-Euk524 | SAMN01729997 |
| 0 | 0 | 0 | 0 | 0 | 1 | Cercozoa      | Bodomorpha sp. HFCC57                      | RG-Euk525 | SAMN01729998 |
| 0 | 0 | 0 | 0 | 0 | 1 | Basidiomycota | Leucosporidium sp. AY30                    | RG-Euk526 | SAMN01729999 |
| 0 | 0 | 0 | 0 | 0 | 2 | Cercozoa      | Bodomorpha sp. HFCC57                      | RG-Euk527 | SAMN01730000 |
| 0 | 0 | 0 | 0 | 0 | 1 | Cercozoa      | Bodomorpha sp. HFCC57                      | RG-Euk528 | SAMN01730001 |
| 0 | 0 | 0 | 0 | 0 | 1 | Chlorophyta   | Chlamydomonas sp. CCAP 11/159              | RG-Euk529 | SAMN01730002 |
| 0 | 0 | 0 | 0 | 0 | 1 | Cercozoa      | Bodomorpha sp. HFCC57                      | RG-Euk530 | SAMN01730003 |
| 0 | 0 | 0 | 0 | 0 | 1 | Cercozoa      | Heteromita globosa                         | RG-Euk531 | SAMN01730004 |
| 0 | 0 | 0 | 0 | 0 | 1 | Arthropoda    | Pemphigus betae                            | RG-Euk532 | SAMN01730005 |
| 0 | 0 | 0 | 0 | 0 | 1 | Chlorophyta   | Chlorococcalean sp. 84/98                  | RG-Euk533 | SAMN01730006 |
| 0 | 0 | 0 | 0 | 0 | 1 | Cercozoa      | Heteromita globosa                         | RG-Euk534 | SAMN01730007 |
| 0 | 0 | 0 | 0 | 0 | 1 | Cercozoa      | Bodomorpha sp. HFCC57                      | RG-Euk535 | SAMN01730008 |
| 0 | 0 | 0 | 0 | 0 | 1 | Cercozoa      | Bodomorpha sp. HFCC56                      | RG-Euk536 | SAMN01730009 |
| 0 | 0 | 0 | 0 | 0 | 1 | Basidiomycota | Sporobolomyces sp. ER2                     | RG-Euk537 | SAMN01730010 |
| 0 | 0 | 0 | 0 | 0 | 1 | Cercozoa      | Heteromita globosa                         | RG-Euk538 | SAMN01730011 |
| 0 | 0 | 0 | 0 | 0 | 1 | Cercozoa      | Bodomorpha sp. HFCC57                      | RG-Euk539 | SAMN01730012 |
| 0 | 0 | 0 | 0 | 0 | 1 | Cercozoa      | Bodomorpha sp. HFCC57                      | RG-Euk540 | SAMN01730013 |
| 0 | 0 | 0 | 0 | 0 | 1 | Basidiomycota | Kriegeria eriophori isolate AFTOL-ID 886   | RG-Euk541 | SAMN01730014 |
| 0 | 0 | 0 | 0 | 0 | 1 | Cercozoa      | Heteromita globosa                         | RG-Euk542 | SAMN01730015 |
| 0 | 0 | 0 | 0 | 0 | 1 | Cercozoa      | Bodomorpha sp. HFCC57                      | RG-Euk543 | SAMN01730016 |
| 0 | 0 | 0 | 0 | 0 | 1 | Cercozoa      | Bodomorpha sp. HFCC57                      | RG-Euk544 | SAMN01730017 |
| 0 | 0 | 0 | 0 | 0 | 1 | Chlorophyta   | Chlamydomonas sp. CCAP 11/159              | RG-Euk545 | SAMN01730018 |
| 0 | 0 | 0 | 0 | 0 | 1 | Cercozoa      | Bodomorpha sp. HFCC56                      | RG-Euk546 | SAMN01730019 |
| 0 | 0 | 0 | 0 | 0 | 1 | Basidiomycota | Walleimia sebi strain EXF-757              | RG-Euk547 | SAMN01730020 |
| 0 | 0 | 0 | 0 | 0 | 1 | Cercozoa      | Bodomorpha sp. HFCC57                      | RG-Euk548 | SAMN01730021 |
| 0 | 0 | 0 | 0 | 0 | 1 | Cercozoa      | Bodomorpha sp. HFCC57                      | RG-Euk549 | SAMN01730022 |
| 0 | 0 | 0 | 0 | 0 | 1 | Basidiomycota | Kriegeria eriophori isolate AFTOL-ID 886   | RG-Euk550 | SAMN01730023 |
| 0 | 0 | 0 | 0 | 0 | 1 | Chlorophyta   | Chlamydomonas reinhardtii strain SAG 53.72 | RG-Euk551 | SAMN01730024 |
| 0 | 0 | 0 | 0 | 0 | 1 | Basidiomycota | Kriegeria eriophori isolate AFTOL-ID 886   | RG-Euk552 | SAMN01730025 |
| 0 | 0 | 0 | 0 | 0 | 1 | Cercozoa      | Bodomorpha sp. HFCC56                      | RG-Euk553 | SAMN01730026 |
| 0 | 0 | 0 | 0 | 0 | 1 | Cercozoa      | Bodomorpha sp. HFCC57                      | RG-Euk554 | SAMN01730027 |
| 0 | 0 | 0 | 0 | 0 | 1 | Chlorophyta   | Chlamydomonas sp. CCAP 11/159              | RG-Euk555 | SAMN01730028 |
| 0 | 0 | 0 | 0 | 0 | 1 | Cercozoa      | Bodomorpha sp. HFCC56                      | RG-Euk556 | SAMN01730029 |
| 0 | 0 | 0 | 0 | 0 | 1 | Cercozoa      | Heteromita globosa                         | RG-Euk557 | SAMN01730030 |

|   |   |   |   |   |   |               |                                          |           |              |
|---|---|---|---|---|---|---------------|------------------------------------------|-----------|--------------|
| 0 | 0 | 0 | 0 | 0 | 1 | Cercozoa      | Bodomorpha minima                        | RG-Euk558 | SAMN01730031 |
| 0 | 0 | 0 | 0 | 0 | 1 | Cercozoa      | Heteromita globosa                       | RG-Euk559 | SAMN01730032 |
| 0 | 0 | 0 | 0 | 0 | 1 | Cercozoa      | Bodomorpha sp. HFCC56                    | RG-Euk560 | SAMN01730033 |
| 0 | 0 | 0 | 0 | 0 | 1 | Chlorophyta   | Chlorococcalean sp. 84/98                | RG-Euk561 | SAMN01730034 |
| 0 | 0 | 0 | 0 | 0 | 1 | Chlorophyta   | Chloromonas augustae                     | RG-Euk562 | SAMN01730035 |
| 0 | 0 | 0 | 0 | 0 | 1 | Chlorophyta   | Chlamydomonas sp. CCAP 11/165            | RG-Euk563 | SAMN01730036 |
| 0 | 0 | 0 | 0 | 0 | 1 | Cercozoa      | Heteromita globosa                       | RG-Euk564 | SAMN01730037 |
| 0 | 0 | 0 | 0 | 0 | 1 | Chlorophyta   | Chlamydomonas sp. CCAP 11/159            | RG-Euk565 | SAMN01730038 |
| 0 | 0 | 0 | 0 | 0 | 1 | Basidiomycota | Kriegeria eriophori isolate AFTOL-ID 886 | RG-Euk566 | SAMN01730039 |
| 0 | 0 | 0 | 0 | 0 | 1 | Cercozoa      | Bodomorpha sp. HFCC57                    | RG-Euk567 | SAMN01730040 |
| 0 | 0 | 0 | 0 | 0 | 1 | Chlorophyta   | Chlorophyte sp. SA-GKS                   | RG-Euk568 | SAMN01730041 |
| 0 | 0 | 0 | 0 | 0 | 1 | Ascomycota    | Rhinoctadiella sp. MA 4765               | RG-Euk569 | SAMN01730042 |
| 0 | 0 | 0 | 0 | 0 | 1 | Chlorophyta   | Chlorophyte sp. SA-GKS                   | RG-Euk570 | SAMN01730043 |
| 0 | 0 | 0 | 0 | 0 | 1 | Cercozoa      | Bodomorpha sp. HFCC57                    | RG-Euk571 | SAMN01730044 |

<sup>a</sup>Closest cultured representative as determined by BLASTn

<sup>b</sup>Representative sequence

## REFERENCES

Boyd ES, Skidmore M, Mitchell AC, Bakermans C, Peters JW. (2010). Methanogenesis in subglacial sediments. *Environ Microbiol Rep* **2**: 685–692.

Boyd ES, Lange RK, Mitchell AC, Havig JR, Hamilton TL, Lafrenière MJ et al. (2011). Diversity, abundance, and potential activity of nitrifying and nitrate-reducing microbial assemblages in a subglacial ecosystem. *Appl Environ Microbiol* **77**: 4778-4787.

Hamilton TL, Boyd ES, Peters JW. (2011). Environmental constraints underpin the distribution and phylogenetic diversity of *nifH* in the Yellowstone geothermal complex. *Microb Ecol* **61**:860–870.
